# Supplementary material for: On the mechanism of the reaction of a magnesium(i) complex with CO2: a concerted type of pathway
Source: Royal Society of Chemistry journal article supplement (doi:10.1039/c4cc04984e), 2014-09-03
Supplement: c4cc04984e1.pdf [file c4cc04984e1.pdf]

**- *Electronic Supplementary Information* -**

**On the Mechanism of the Reaction of a Magnesium(I) Complex with CO<sub>2</sub>. A  
Concerted Type of Pathway..**

Christos E. Kefalidis,<sup>a</sup> Andreas Stasch,<sup>b</sup> Cameron Jones<sup>\*,b</sup> and Laurent Maron<sup>\*,a</sup>

<sup>a</sup>Université de Toulouse et CNRS, INSA, UPS, UMR 5215, LPCNO, 135 Avenue de Rangueil, F-31077 Toulouse, France.

<sup>b</sup>School of Chemistry, Monash University, PO Box 23, VIC, 3800, Australia.

# COMPUTATIONAL DATA

## Computational details

Quantum-chemical calculations: Geometry optimizations were performed with the Gaussian09 suite of programs (revision D.02)<sup>1</sup> using the Becke's 3-parameter hybrid functional,<sup>2</sup> combined with the non-local correlation functional provided by Perdew/Wang.<sup>3</sup> The 6-311+G(d) all-electron basis set was used for the magnesium atom, and the 6-31G(d) for the remaining atoms.<sup>4</sup> We have also considered in the present study the dispersion effects. In particular the third generation of Grimme's dispersion corrections with Becke-Johnson damping<sup>5</sup> model on the B3PW91 geometries (single point calculations), with the energies denoted as  $\Delta G^{\text{disp}}$ . All stationary points have been identified for minimum (Nimag=0) or transition states (Nimag=1). Intrinsic Reaction Paths (IRPs)<sup>6</sup> were traced from the various transition structures to obtain the connected intermediates. Natural population analysis (NPA) was performed using Weinhold's methodology.<sup>7</sup>

- (1) Gaussian 09, Revision D.02, M. J. Frisch, G. W. Trucks, H. B. Schlegel, G. E. Scuseria, M. A. Robb, J. R. Cheeseman, G. Scalmani, V. Barone, B. Mennucci, G. A. Petersson, H. Nakatsuji, M. Caricato, X. Li, H. P. Hratchian, A. F. Izmaylov, J. Bloino, G. Zheng, J. L. Sonnenberg, M. Hada, M. Ehara, K. Toyota, R. Fukuda, J. Hasegawa, M. Ishida, T. Nakajima, Y. Honda, O. Kitao, H. Nakai, T. Vreven, J. A. Montgomery, Jr., J. E. Peralta, F. Ogliaro, M. Bearpark, J. J. Heyd, E. Brothers, K. N. Kudin, V. N. Staroverov, R. Kobayashi, J. Normand, K. Raghavachari, A. Rendell, J. C. Burant, S. S. Iyengar, J. Tomasi, M. Cossi, N. Rega, J. M. Millam, M. Klene, J. E. Knox, J. B. Cross, V. Bakken, C. Adamo, J. Jaramillo, R. Gomperts, R. E. Stratmann, O. Yazyev, A. J. Austin, R. Cammi, C. Pomelli, J. W. Ochterski, R. L. Martin, K. Morokuma, V. G. Zakrzewski, G. A. Voth, P. Salvador, J. J. Dannenberg, S. Dapprich, A. D. Daniels, O. Farkas, J. B. Foresman, J. V. Ortiz, J. Cioslowski, D. J. Fox, Gaussian, Inc., Wallingford CT, 2009.
- (2) A. D. Becke, *J. Chem. Phys.* 1993, 98, 5648.
- (3) J. P. Perdew, Y. Wang, *Phys. Rev. B* 1992, 45, 13244.
- (4) (a) A. D. McLean, G. S. Chandler, *J. Chem. Phys.* 1980, 72, 5639. (b) W. J. Hehre, R. Ditchfield, J. A. Pople, *J. Chem. Phys.* 1972, 56, 2257.
- (5) S. Grimme, S. Ehrlich, L. Goerigk, *J. Comp. Chem.* **2011**, 32, 1456-1465.
- (6) (a) C. Gonzalez, H. B. Schlegel, *J. Chem. Phys.* 1989, 90, 2154. (b) C. Gonzalez, H. B. Schlegel, *J. Phys. Chem.* 1990, 94, 5523.
- (7) (a) A. E. Reed, L. A. Curtiss, F. Weinhold, *Chem. Rev.* 1988, 88, 899. (b) F. Weinhold, In *The Encyclopedia of Computational Chemistry* (Eds.: Schleyer, P. v. R.), John Wiley & Sons, Chichester, pp 1792, 1998.

**Table S1.** Relative energies in enthalpy, Gibbs free energy, and Gibbs free including the dispersion correction, for all the pathways involved in the present study.

|                                             | $\Delta H$ ( $\Delta H^\ddagger$ ) | $\Delta G$ ( $\Delta G^\ddagger$ ) | $\Delta G^{\text{disp}}$ ( $\Delta G^{\ddagger\text{disp}}$ ) |
|---------------------------------------------|------------------------------------|------------------------------------|---------------------------------------------------------------|
| <i>Oxo carbonate (CO<sub>2</sub>)</i>       |                                    |                                    |                                                               |
| <b>I</b>                                    | 0.0                                | 0.0                                | 0.0                                                           |
| <sup>ins</sup> TS <sub>I-II</sub>           | 9.8 (9.8)                          | 20.0 (20.0)                        | 8.8 (8.8)                                                     |
| <b>II</b>                                   | -52.9                              | -45.1                              | -47.2                                                         |
| <sup>oxo</sup> TS <sub>II-III</sub>         | -25.1 (27.8)                       | -18.5 (26.6)                       | -27.2 (20.1)                                                  |
| <b>III</b>                                  | -30.3                              | -35.2                              | -36.1                                                         |
| <sup>oxo</sup> TS <sub>III-IV</sub>         | -30.2 (0.1)                        | -20.6 (14.6)                       | -32.7 (3.4)                                                   |
| <b>IV</b>                                   | -80.8                              | -70.9                              | -76.6                                                         |
| <i>Concerted carbonate (CO<sub>2</sub>)</i> |                                    |                                    |                                                               |
| <b>I</b>                                    | 0.0                                | 0.0                                | 0.0                                                           |
| <sup>ins</sup> TS <sub>I-II</sub>           | 9.8 (9.8)                          | 20.0 (20.0)                        | 8.8 (8.8)                                                     |
| <b>II</b>                                   | -52.9                              | -45.1                              | -47.2                                                         |
| <sup>con</sup> TS <sub>II-V</sub>           | -49.3 (2.5)                        | -32.3 (12.8)                       | -37.1 (10.2)                                                  |
| <b>V</b>                                    | -55.1                              | -38.1                              | -39.2                                                         |
| <sup>con</sup> TS <sub>V-IV</sub>           | -51.3 (3.8)                        | -33.9 (4.1)                        | -36.0 (3.2)                                                   |
| <b>IV</b>                                   | -80.8                              | -70.9                              | -76.6                                                         |
| <i>Oxalate (CO<sub>2</sub>)</i>             |                                    |                                    |                                                               |
| <b>I</b>                                    | 0.0                                | 0.0                                | 0.0                                                           |
| <sup>ins</sup> TS <sub>I-II</sub>           | 9.8 (9.8)                          | 20.0 (20.0)                        | 8.8 (8.8)                                                     |
| <b>II</b>                                   | -52.9                              | -45.1                              | -47.2                                                         |
| <sup>oxa</sup> TS <sub>II-VI</sub>          | -42.3 (10.6)                       | -26.6 (18.4)                       | -26.7 (20.6)                                                  |
| <b>VI</b>                                   | -119.4                             | -101.0                             | -97.6                                                         |
| <i>Oxo (CS<sub>2</sub>)</i>                 |                                    |                                    |                                                               |
| <b>I</b>                                    | 0.0                                | 0.0                                | 0.0                                                           |
| <sup>ins</sup> TS <sub>I-II</sub>           | 9.8 (9.8)                          | 20.0 (20.0)                        | 8.8 (8.8)                                                     |
| <b>II</b>                                   | -52.9                              | -45.1                              | -47.2                                                         |
| <sup>oxo</sup> TS <sub>II-VII</sub>         | -16.2 (14.1)                       | -1.8 (28.5)                        | -23.8 (6.5)                                                   |
| <b>VII</b>                                  | -70.8                              | -56.0                              | -75.6                                                         |

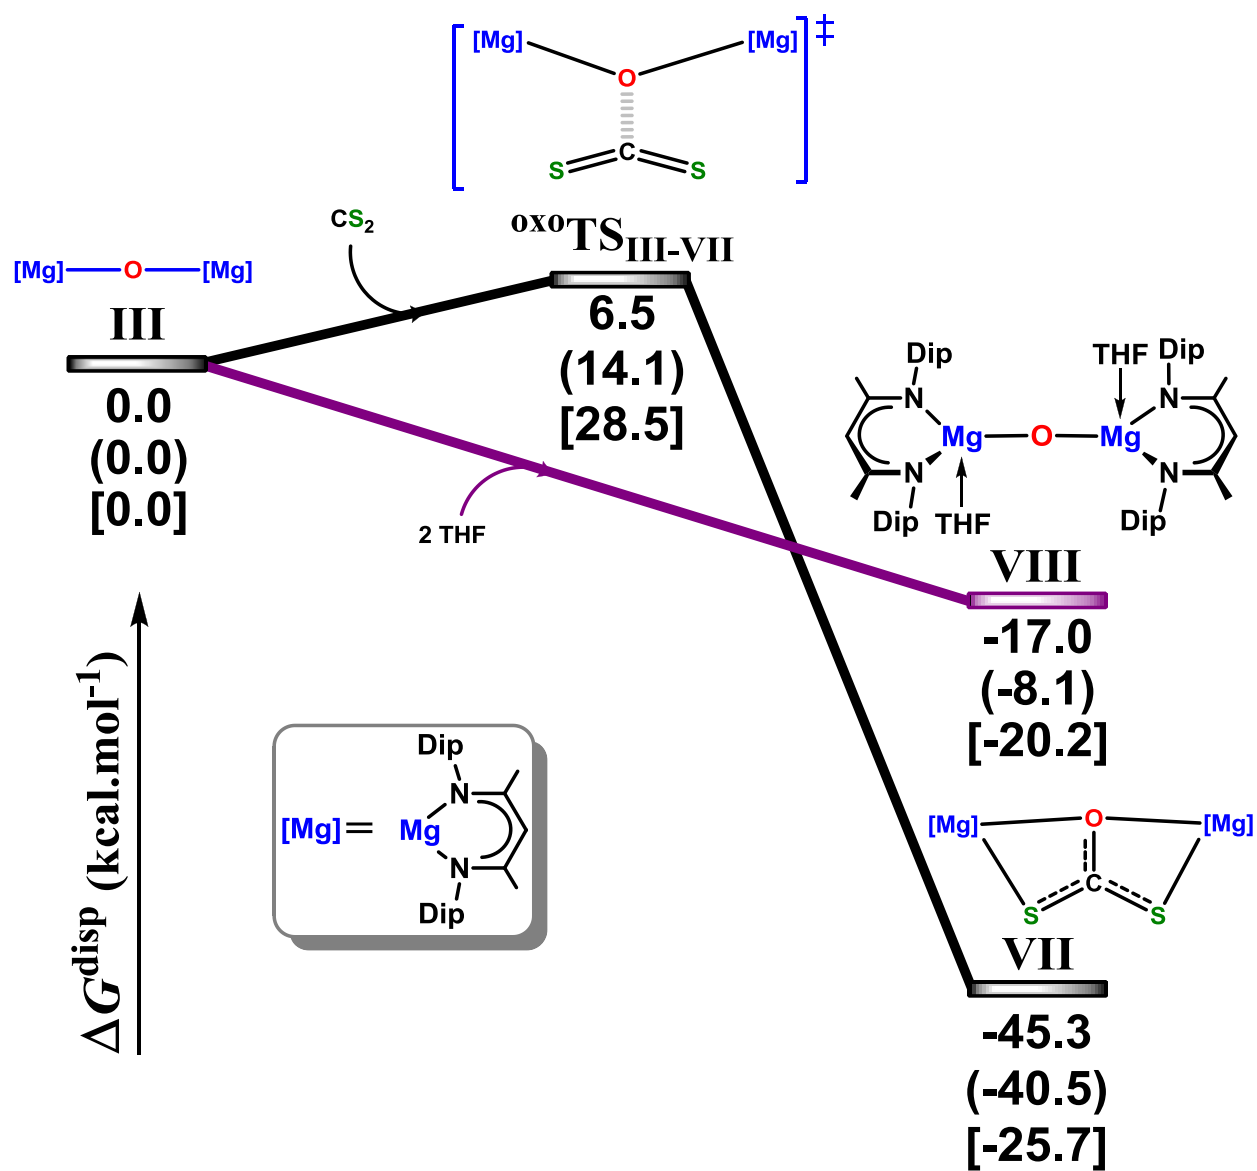

**Figure S1.** Energy profile for the reaction of the oxo complex **III** with  $\text{CS}_2$  to afford complex **VII**, or the corresponding THF adduct, **VIII**. The Gibbs free energies including dispersion corrections are displayed (and given in kcal mol<sup>-1</sup>) whereas the relative energies in parentheses correspond to the enthalpy without dispersion correction, while in brackets are the Gibbs free energies without dispersion correction.

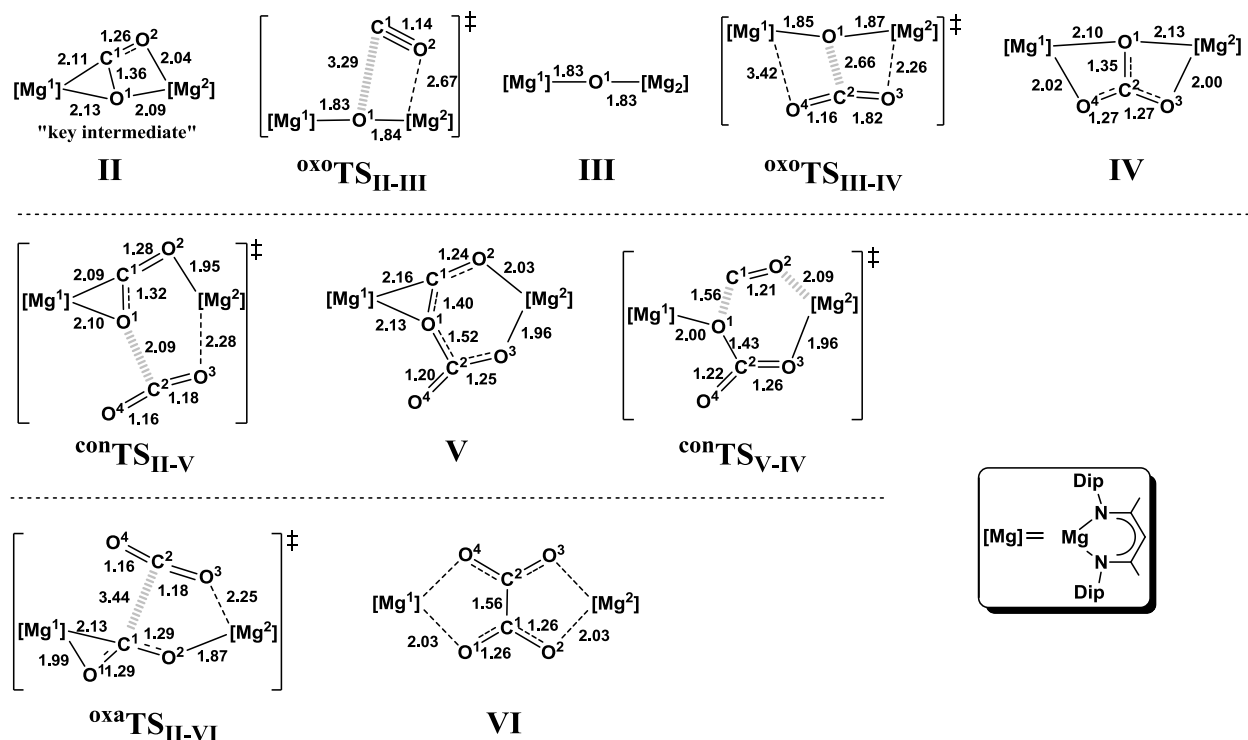

**Figure S2.** The most important bond distances (Å) for various model complexes, intermediates, and transition states involved in the mechanistic studies.

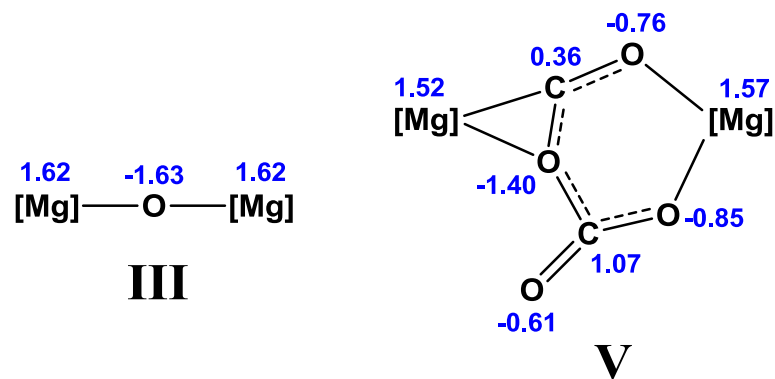

**Figure S3.** Natural charges of the intermediates **III** and **V** (figures in blue).

## Cartesian Coordinates of Optimized Structures with their corresponding $\Delta H$ , $\Delta G$ and $\Delta G+GD3BJ$ values.

**I**

$H = -2876.535776$  au

$G = -2876.717951$  au

$GD3BJ = -0.4039532137$  au

|    |             |             |             |
|----|-------------|-------------|-------------|
| Mg | 1.77063400  | 5.75591000  | 10.02734300 |
| N  | 1.66017300  | 7.87026800  | 10.10829500 |
| C  | 0.41238600  | 9.98868800  | 10.36457500 |
| H  | 1.01459000  | 10.25637600 | 11.23690900 |
| H  | -0.61967500 | 10.30462100 | 10.53543700 |
| H  | 0.80901100  | 10.56765100 | 9.52336000  |
| N  | -0.13897900 | 5.63625000  | 9.13666400  |
| C  | 0.48033100  | 8.50210400  | 10.07424400 |
| C  | -0.74585000 | 7.90755400  | 9.72725900  |
| H  | -1.59852400 | 8.57643500  | 9.76202800  |
| C  | -1.01860900 | 6.63537000  | 9.18591300  |
| C  | -2.41235400 | 6.44809600  | 8.62310200  |
| H  | -2.37391600 | 6.01758100  | 7.61760800  |
| H  | -2.95019900 | 7.39776900  | 8.57771100  |
| H  | -2.99480100 | 5.75437600  | 9.23815800  |
| C  | 2.82994800  | 8.69548300  | 10.18846200 |
| C  | 3.48128700  | 8.91792100  | 11.42384100 |
| C  | 4.60080100  | 9.75713400  | 11.45576100 |
| H  | 5.09371800  | 9.94701500  | 12.40661400 |
| C  | 5.09516400  | 10.35473900 | 10.30408600 |
| H  | 5.96468400  | 11.00577400 | 10.35187300 |
| C  | 4.47158000  | 10.10231000 | 9.08799400  |
| H  | 4.86782000  | 10.55521100 | 8.18191100  |
| C  | 3.34262000  | 9.28296700  | 9.00377400  |
| C  | 3.01379500  | 8.28168500  | 12.72377600 |
| H  | 2.16712900  | 7.62653300  | 12.48747000 |
| C  | 4.12240800  | 7.41554700  | 13.33878700 |
| H  | 4.44579800  | 6.63687800  | 12.63902100 |
| H  | 3.77107700  | 6.92819500  | 14.25535300 |
| H  | 5.00247200  | 8.01493500  | 13.60126700 |
| C  | 2.52661800  | 9.32408000  | 13.74139900 |
| H  | 3.33338100  | 10.00982300 | 14.02686600 |
| H  | 2.17103300  | 8.83208300  | 14.65516100 |
| H  | 1.70278200  | 9.92655300  | 13.34437700 |
| C  | 2.72385600  | 9.02984900  | 7.63513400  |
| H  | 1.79487800  | 8.47007400  | 7.78283600  |
| C  | 3.65489900  | 8.16342600  | 6.77385900  |
| H  | 4.61098300  | 8.67048400  | 6.59477100  |
| H  | 3.19834500  | 7.95744000  | 5.79805400  |
| H  | 3.87500600  | 7.20534500  | 7.25682600  |
| C  | 2.36915500  | 10.32648600 | 6.89250000  |
| H  | 1.71149900  | 10.97113300 | 7.48578600  |
| H  | 1.85411000  | 10.09550800 | 5.95218700  |
| H  | 3.26398500  | 10.90811200 | 6.64101200  |
| C  | -0.50673500 | 4.41418400  | 8.48824400  |
| C  | -1.23816200 | 3.42114700  | 9.18373200  |
| C  | -1.49714100 | 2.20551800  | 8.54277600  |
| H  | -2.04969300 | 1.43406400  | 9.07405000  |
| C  | -1.06949600 | 1.96256900  | 7.24292600  |
| H  | -1.28613700 | 1.01162400  | 6.76234400  |
| C  | -0.36991200 | 2.95065300  | 6.56158600  |

|    |             |             |             |
|----|-------------|-------------|-------------|
| H  | -0.04825400 | 2.76778200  | 5.53897000  |
| C  | -0.07429900 | 4.17948800  | 7.16072000  |
| C  | -1.74379900 | 3.62295200  | 10.60510600 |
| H  | -1.57199900 | 4.66962900  | 10.87914100 |
| C  | -0.96577900 | 2.75374900  | 11.59937200 |
| H  | -1.09591800 | 1.68826200  | 11.37740700 |
| H  | -1.31347400 | 2.92548100  | 12.62416100 |
| H  | 0.10752400  | 2.96958500  | 11.56892300 |
| C  | -3.24958000 | 3.34534300  | 10.73753000 |
| H  | -3.84226200 | 3.91175400  | 10.01050900 |
| H  | -3.59622400 | 3.61452900  | 11.74250400 |
| H  | -3.47754800 | 2.28323900  | 10.58839700 |
| C  | 0.66196800  | 5.23553600  | 6.34786000  |
| H  | 0.86740500  | 6.08243400  | 7.01224000  |
| C  | 2.00625500  | 4.72431300  | 5.81356100  |
| H  | 1.87357400  | 3.88003600  | 5.12644700  |
| H  | 2.66185000  | 4.39147500  | 6.62495100  |
| H  | 2.52621300  | 5.51698800  | 5.26342700  |
| C  | -0.21044300 | 5.75910600  | 5.19623600  |
| H  | -0.45131800 | 4.95864300  | 4.48601200  |
| H  | 0.31327500  | 6.54927600  | 4.64412200  |
| H  | -1.15598000 | 6.17409900  | 5.56215800  |
| Mg | 3.59720000  | 3.68771900  | 11.04104100 |
| N  | 5.51318700  | 3.07061600  | 10.41873900 |
| N  | 3.67570200  | 2.40328100  | 12.72500300 |
| C  | 7.76124400  | 2.10753100  | 10.72862700 |
| H  | 7.69557800  | 1.47911900  | 9.83373700  |
| H  | 8.33180900  | 1.56961700  | 11.48900500 |
| H  | 8.32230000  | 3.00119600  | 10.43986100 |
| C  | 6.37544700  | 2.45772000  | 11.22807300 |
| C  | 6.08323300  | 2.07045300  | 12.55096800 |
| H  | 6.92467300  | 1.66474500  | 13.10138800 |
| C  | 4.84604600  | 1.97263300  | 13.21261600 |
| C  | 4.88936400  | 1.26431700  | 14.55249600 |
| H  | 4.28244900  | 1.78359400  | 15.29915900 |
| H  | 5.91599000  | 1.18984600  | 14.91943800 |
| H  | 4.48345200  | 0.24990600  | 14.47283500 |
| C  | 5.90957700  | 3.36230400  | 9.07482900  |
| C  | 5.49065700  | 2.50919900  | 8.02657900  |
| C  | 5.81396900  | 2.84948300  | 6.70879300  |
| H  | 5.49829500  | 2.19518100  | 5.89927500  |
| C  | 6.53195300  | 4.00159900  | 6.41397200  |
| H  | 6.77170800  | 4.25118400  | 5.38323600  |
| C  | 6.94558300  | 4.82965500  | 7.45111900  |
| H  | 7.50946900  | 5.73030100  | 7.22018500  |
| C  | 6.65430700  | 4.53170000  | 8.78566700  |
| C  | 4.72493000  | 1.21948800  | 8.28610400  |
| H  | 4.55035000  | 1.14806000  | 9.36568800  |
| C  | 5.54257500  | -0.01356900 | 7.87122500  |
| H  | 5.73489900  | -0.02012000 | 6.79141800  |
| H  | 5.00109300  | -0.93496900 | 8.11831400  |
| H  | 6.51216100  | -0.04507500 | 8.38039000  |
| C  | 3.35753400  | 1.21688300  | 7.59014400  |
| H  | 2.73593400  | 2.05664900  | 7.91937800  |
| H  | 2.81484300  | 0.29000800  | 7.80917100  |
| H  | 3.46208600  | 1.28967300  | 6.50101200  |

|   |             |             |             |
|---|-------------|-------------|-------------|
| C | 7.13006500  | 5.48407700  | 9.87351500  |
| H | 6.94834000  | 5.00743200  | 10.84291300 |
| C | 6.32769100  | 6.78984300  | 9.84635900  |
| H | 6.46877700  | 7.32048000  | 8.89766400  |
| H | 6.64195900  | 7.46087600  | 10.65359800 |
| H | 5.25473500  | 6.60184500  | 9.96357600  |
| C | 8.63327600  | 5.78776700  | 9.78017600  |
| H | 8.87404300  | 6.36526400  | 8.87983700  |
| H | 9.23999500  | 4.87539400  | 9.75654400  |
| H | 8.95173100  | 6.38377700  | 10.64379800 |
| C | 2.49323600  | 1.94053400  | 13.39066800 |
| C | 1.99019000  | 0.65036000  | 13.08352500 |
| C | 0.85082600  | 0.19164900  | 13.74976400 |
| H | 0.46339400  | -0.79778600 | 13.51769800 |
| C | 0.20611900  | 0.96939400  | 14.70434900 |
| H | -0.67116800 | 0.58980600  | 15.22245400 |
| C | 0.68909700  | 2.24174000  | 14.97956700 |
| H | 0.18005300  | 2.85646300  | 15.71851800 |
| C | 1.81891700  | 2.75324000  | 14.33112000 |
| C | 2.63084000  | -0.24358700 | 12.02962300 |
| H | 3.56407100  | 0.22933500  | 11.70853000 |
| C | 1.72262200  | -0.36118100 | 10.79636000 |
| H | 0.76629300  | -0.83232200 | 11.05518900 |
| H | 2.19890900  | -0.97622400 | 10.02300800 |
| H | 1.50058500  | 0.62018500  | 10.36350700 |
| C | 2.98179800  | -1.63973700 | 12.56441800 |
| H | 3.62108900  | -1.58842500 | 13.45248300 |
| H | 3.51598300  | -2.21514100 | 11.79866400 |
| H | 2.08453000  | -2.20924900 | 12.83450100 |
| C | 2.27256300  | 4.16480600  | 14.66928000 |
| H | 3.13531400  | 4.39783700  | 14.03435000 |
| C | 2.72162400  | 4.29842400  | 16.13228600 |
| H | 1.89735500  | 4.08536500  | 16.82366700 |
| H | 3.06958200  | 5.31870000  | 16.33563300 |
| H | 3.54118800  | 3.61225600  | 16.37078700 |
| C | 1.16834600  | 5.18452400  | 14.35545100 |
| H | 0.87057500  | 5.12942500  | 13.30215900 |
| H | 1.51200800  | 6.20473500  | 14.56082900 |
| H | 0.27400000  | 5.00972300  | 14.96558000 |

<sup>ins</sup>TS<sub>I-II</sub>

$H = -3065.009143 \text{ au.}$

$G = -3065.199256 \text{ au}$

$GD3BJ = -0.4234198082 \text{ au}$

|   |             |             |             |
|---|-------------|-------------|-------------|
| H | -4.32207200 | 1.49569300  | -4.93034300 |
| H | -4.75738600 | 2.94537400  | -4.01992400 |
| C | -4.61875600 | 1.86080300  | -3.93969400 |
| H | -5.59288500 | 1.42142700  | -3.69740600 |
| H | 2.09328200  | 2.63398400  | -5.46238400 |
| H | 0.94681200  | 3.97624600  | -5.44659200 |
| H | 4.25606300  | -0.48277700 | -4.87333000 |
| H | -1.89775900 | 1.87354200  | -4.27356900 |
| H | 4.92987900  | -2.03001600 | -4.35749000 |
| H | 0.12656900  | -5.38486600 | -3.88617200 |
| C | 1.33477700  | 3.13973500  | -4.85292200 |
| H | 3.79488100  | 4.22729300  | -4.51741800 |
| H | 2.64424600  | 5.55273400  | -4.26410100 |
| C | 4.24566200  | -1.22419600 | -4.06535900 |
| H | 0.50952000  | 2.44144700  | -4.68531800 |
| H | 3.23879400  | -1.64716500 | -4.00465600 |
| H | -2.30913600 | 3.26673500  | -3.25587300 |

|    |             |             |             |
|----|-------------|-------------|-------------|
| H  | 6.20618000  | 0.60967300  | -3.73905600 |
| C  | 3.05977400  | 4.64150900  | -3.81602800 |
| C  | -2.21880700 | 2.17565000  | -3.26864200 |
| H  | -5.74529100 | -0.10690900 | -2.15974000 |
| C  | -3.54408100 | 1.50069500  | -2.90238800 |
| H  | -3.38850100 | 0.41759100  | -2.94995000 |
| H  | 1.51285000  | -3.31961200 | -3.42633100 |
| H  | -0.00659700 | 5.40102300  | -4.05985400 |
| C  | 0.13803700  | -5.60629400 | -2.81206200 |
| H  | -0.75409100 | -6.19905100 | -2.58250600 |
| H  | 6.81382000  | -0.87463400 | -2.98172700 |
| H  | 1.01267100  | -6.23790100 | -2.61662700 |
| C  | 1.95168700  | 3.61425800  | -3.53063600 |
| H  | -6.31357900 | -1.74559800 | -1.78071500 |
| C  | 6.10638200  | -0.04427700 | -2.86372400 |
| O  | -0.54651200 | -0.94007500 | -3.59889500 |
| H  | -4.44184500 | 3.87712300  | -1.99386200 |
| H  | 3.59392900  | 4.92918300  | -2.90531300 |
| H  | -1.43130800 | 1.91214000  | -2.55396200 |
| H  | 5.43579300  | -3.14960000 | -2.53758000 |
| C  | -5.72400000 | -0.90373800 | -1.41113700 |
| H  | -4.87691900 | -3.28041000 | -1.63803900 |
| H  | -0.65752800 | -3.68321200 | -2.30784700 |
| C  | 4.66462100  | -0.56575100 | -2.74437900 |
| C  | -0.01762600 | 5.10335400  | -3.01409500 |
| C  | 1.47440100  | -3.53357400 | -2.35068000 |
| H  | 2.42266300  | 2.74990400  | -3.05202800 |
| C  | 0.19471200  | -4.30013400 | -2.00372600 |
| H  | 2.36916900  | -4.10889200 | -2.09109100 |
| H  | -2.35345600 | -5.47554400 | -1.35889300 |
| C  | -3.95781800 | 1.84743900  | -1.47944400 |
| H  | 4.01508200  | 0.30036700  | -2.58370800 |
| C  | 0.37167200  | -0.33513400 | -3.20196500 |
| H  | -1.67730200 | 6.38829800  | -2.53151900 |
| C  | -4.41397600 | 3.13832500  | -1.19675700 |
| H  | 6.40694800  | 0.53102600  | -1.98303000 |
| H  | -6.21721000 | -0.50299200 | -0.51926300 |
| C  | -4.04975200 | -2.70513300 | -1.23921100 |
| C  | 0.91569100  | 4.16577300  | -2.55943700 |
| C  | -4.30468400 | -1.33085200 | -1.09443200 |
| H  | -3.19628800 | -5.39267800 | 0.17518500  |
| H  | 1.53366000  | -2.58830200 | -1.80012600 |
| C  | 4.98270100  | -2.79907800 | -1.61342800 |
| C  | -0.95676100 | 5.66500400  | -2.15691400 |
| C  | -3.17132800 | -4.97266000 | -0.83602400 |
| C  | 4.50320700  | -1.48715700 | -1.54116300 |
| C  | -2.96221100 | -3.47261300 | -0.78896500 |
| N  | -3.41357700 | -0.42659200 | -0.67541300 |
| C  | -3.90985900 | 0.89687900  | -0.43207900 |
| Mg | -1.33556800 | -0.89256000 | -0.47704800 |
| H  | 5.26862900  | -4.68181500 | -0.60733000 |
| C  | -4.84500700 | 3.49240100  | 0.07646800  |
| H  | -5.20772600 | 4.49852000  | 0.27314500  |
| C  | 4.89528900  | -3.66345600 | -0.52809600 |
| C  | 0.08498300  | -4.53579700 | -0.50473400 |
| N  | -1.82134700 | -2.97313700 | -0.30325300 |
| O  | 1.36961300  | 0.27790500  | -3.03113800 |
| H  | -4.11097300 | -5.22239800 | -1.33385000 |
| Mg | 1.41007400  | 0.76907300  | -0.65010800 |
| C  | 0.90494800  | 3.80806100  | -1.18885800 |
| H  | 1.75538200  | -5.88796600 | -0.48726900 |
| C  | -0.95956500 | 5.30427100  | -0.81463100 |

|   |             |             |             |
|---|-------------|-------------|-------------|
| H | 2.74207000  | 5.41828900  | -0.85682900 |
| N | 1.86255600  | 2.85957000  | -0.69886600 |
| C | 0.98152400  | -5.41412700 | 0.11172600  |
| C | 3.93932500  | -1.03833400 | -0.32089400 |
| C | -0.91000200 | -3.91204500 | 0.28428600  |
| C | -4.35471200 | 1.24492200  | 0.86581500  |
| H | -6.47811500 | -0.32606700 | 1.74714300  |
| C | -4.81863400 | 2.54479700  | 1.09272900  |
| N | 3.45296100  | 0.30745100  | -0.22612900 |
| H | -1.68984100 | 5.75073800  | -0.14466400 |
| C | -0.02835400 | 4.39585900  | -0.30251100 |
| C | 4.33853900  | -3.21254100 | 0.66282100  |
| C | 2.98260500  | 3.36208000  | -0.16954200 |
| H | 6.12758100  | 0.01316500  | 0.18588200  |
| C | 3.15386800  | 4.86206900  | -0.01240000 |
| C | 4.31047300  | 1.22032000  | 0.24290100  |
| H | -1.10203700 | 2.20081800  | 1.02635200  |
| C | 3.87359600  | -1.90080500 | 0.79844600  |
| H | -5.16901800 | 2.81744800  | 2.08594300  |
| H | -6.22508700 | 0.92167400  | 2.97501600  |
| C | 4.06589600  | 2.60163700  | 0.30147400  |
| C | -5.80105500 | 0.00838400  | 2.54047200  |
| H | 4.27882100  | -3.88815200 | 1.51210000  |
| H | 4.20923200  | 5.12125400  | 0.10168400  |
| C | 0.89619400  | -5.70344800 | 1.46822100  |
| H | -4.00465200 | -0.71062200 | 1.62912000  |
| C | -4.37699300 | 0.24461400  | 2.01393700  |
| H | 2.62687000  | 5.21053700  | 0.88393700  |
| C | 5.66083000  | 0.79423200  | 0.78977800  |
| C | -1.01503500 | -4.21220500 | 1.66425800  |
| H | -2.75501700 | -3.00957800 | 1.90765900  |
| H | -2.14395100 | 3.59002500  | 1.34438400  |
| H | 4.87326700  | 3.18517100  | 0.72913500  |
| H | 1.23471900  | -1.64663000 | 1.63680200  |
| C | -1.16830100 | 3.14867500  | 1.57356000  |
| H | 1.59681500  | -6.39713800 | 1.92695400  |
| C | -0.02449400 | 4.09220900  | 1.18934300  |
| H | 6.34166500  | 1.64642500  | 0.85307800  |
| H | -5.79613100 | -0.75954000 | 3.32369000  |
| H | 0.91346700  | 3.57688500  | 1.42203800  |
| C | -0.10211300 | -5.10779800 | 2.23013100  |
| H | 1.92338000  | -3.06176600 | 2.43748300  |
| H | 5.54365000  | 0.38411800  | 1.80000200  |
| C | -2.10542900 | -3.61731400 | 2.54606300  |
| C | 1.93608200  | -1.96698400 | 2.41629300  |
| H | -0.97322000 | -1.85771300 | 3.18276200  |
| C | 3.34503500  | -1.43045200 | 2.14637700  |
| H | 3.27641300  | -0.33756500 | 2.11332900  |
| H | -3.41415200 | -5.37550400 | 2.44802400  |
| H | -1.13708400 | 2.92679400  | 2.64761800  |
| H | -1.04641000 | 5.86835600  | 1.97163700  |
| C | -3.45387000 | 0.67496400  | 3.16226700  |
| H | -3.75863800 | 1.64242500  | 3.57903700  |
| C | -0.07658200 | 5.36329500  | 2.05037700  |
| H | 0.69595700  | 6.08571000  | 1.76374700  |
| H | -2.41633600 | 0.77066700  | 2.82603300  |
| C | -1.52146300 | -2.69563300 | 3.62552200  |
| H | -0.17863400 | -5.34575800 | 3.28895000  |
| C | -2.97927900 | -4.70196700 | 3.19437600  |
| H | 1.56458300  | -1.60153800 | 3.38192200  |
| H | -2.31987600 | -2.28497600 | 4.25498700  |
| H | -3.80372000 | -4.24257200 | 3.75324400  |

|   |             |             |            |
|---|-------------|-------------|------------|
| H | 4.30037200  | -2.87995600 | 3.48658400 |
| H | -3.48222600 | -0.06046800 | 3.97492600 |
| H | 5.31243600  | -1.47660400 | 3.12203800 |
| C | 4.28139700  | -1.79847200 | 3.30728900 |
| H | -0.82747300 | -3.23800200 | 4.27879100 |
| H | 0.07051200  | 5.10792400  | 3.10669100 |
| H | -2.40537700 | -5.31549200 | 3.89934200 |
| H | 3.93692100  | -1.32288200 | 4.23344900 |

## II

$H = -3065.109046 \text{ au}$

$G = -3065.302961 \text{ au}$

$GD3BJ = -0.4090368847 \text{ au}$

|   |             |             |             |
|---|-------------|-------------|-------------|
| H | -4.44613900 | 1.01239400  | -5.03974600 |
| H | -5.10971300 | 2.38456800  | -4.13725300 |
| C | -4.75429700 | 1.35104000  | -4.04309800 |
| H | -5.60353900 | 0.73522700  | -3.72825100 |
| H | 2.31745100  | 2.31712800  | -5.05366500 |
| H | 0.80507400  | 3.23810400  | -5.01749600 |
| H | 4.13405900  | -0.16092200 | -4.45290200 |
| H | -2.06531800 | 1.68186200  | -4.55972400 |
| H | 4.08820000  | -1.84923900 | -3.91731600 |
| H | -0.46331100 | -5.22349700 | -4.27302600 |
| C | 1.54612700  | 2.72774700  | -4.39046400 |
| H | 3.72806600  | 4.38629200  | -4.72927700 |
| H | 2.27961200  | 5.40194300  | -4.74166200 |
| C | 3.94525900  | -0.81216100 | -3.59032900 |
| H | 1.04560300  | 1.89075600  | -3.89269000 |
| H | 2.89539100  | -0.69572400 | -3.30100200 |
| H | -2.64104200 | 3.12553900  | -3.70873600 |
| H | 6.53300400  | 0.16016700  | -3.72084800 |
| C | 2.94065200  | 4.81205600  | -4.09552900 |
| C | -2.38469200 | 2.06699700  | -3.58431400 |
| H | -6.11837800 | -0.13273700 | -1.73948900 |
| C | -3.57594000 | 1.25499300  | -3.06076100 |
| H | -3.26560600 | 0.20542900  | -3.02078300 |
| H | 1.18106500  | -3.34800500 | -3.88636400 |
| H | 0.07643700  | 5.28492300  | -3.97596600 |
| C | -0.43820800 | -5.48453000 | -3.20801900 |
| H | -1.41927600 | -5.89060100 | -2.93971100 |
| H | 6.61446600  | -1.54279200 | -3.25199500 |
| H | 0.30116700  | -6.28419000 | -3.07674800 |
| C | 2.17240600  | 3.69403500  | -3.37431100 |
| H | -6.63996800 | -1.83082000 | -1.62378600 |
| C | 6.35636800  | -0.53884900 | -2.89446100 |
| O | -0.44505100 | -0.65657500 | -2.37306400 |
| H | -4.30320800 | 3.71745000  | -2.24958200 |
| H | 3.41425000  | 5.50178500  | -3.38780400 |
| H | -1.53042200 | 2.00909700  | -2.90511900 |
| H | 5.31641400  | -3.11774200 | -2.18848700 |
| C | -6.03546600 | -1.05135800 | -1.15367600 |
| H | -5.27237800 | -3.46356900 | -1.34162800 |
| H | -0.84748700 | -3.49466800 | -2.54176200 |
| C | 4.89294000  | -0.46025500 | -2.43423500 |
| C | 0.10985500  | 5.06666400  | -2.91101300 |
| C | 1.25905700  | -3.66231800 | -2.83920900 |
| H | 2.90113100  | 3.12759400  | -2.78393100 |
| C | -0.07541700 | -4.25091000 | -2.36588900 |
| H | 2.07155100  | -4.39550600 | -2.76932200 |
| H | -4.36789200 | -5.43225600 | -1.32450000 |
| C | -3.97697700 | 1.67871000  | -1.65436200 |



|    |             |             |             |
|----|-------------|-------------|-------------|
| H  | 4.69671600  | 0.57989800  | -2.15155500 |
| C  | 0.35396900  | -0.03543100 | -1.62083500 |
| H  | -1.64635100 | 6.23473900  | -2.48017900 |
| C  | -4.33288300 | 3.01159700  | -1.42328600 |
| H  | 7.05054800  | -0.28740300 | -2.08463300 |
| H  | -6.46960000 | -0.83784900 | -0.16978100 |
| C  | -4.38769500 | -2.88920000 | -1.09008600 |
| C  | 1.13038100  | 4.24978200  | -2.41321600 |
| C  | -4.59663600 | -1.49967400 | -1.00496200 |
| H  | -2.63350100 | -5.72923800 | -1.05270300 |
| H  | 1.54339600  | -2.78850700 | -2.24768200 |
| C  | 4.92265000  | -2.69579400 | -1.26671400 |
| C  | -0.86033900 | 5.60301000  | -2.07352300 |
| C  | -3.50276200 | -5.16116000 | -0.71397600 |
| C  | 4.63336800  | -1.32873000 | -1.21043600 |
| C  | -3.25971900 | -3.66705300 | -0.76397500 |
| N  | -3.64010300 | -0.59765700 | -0.76817900 |
| C  | -4.02602800 | 0.76824500  | -0.57231700 |
| Mg | -1.65257000 | -1.17100900 | -0.81103500 |
| H  | 4.94292000  | -4.58562600 | -0.23577700 |
| C  | -4.72545700 | 3.45087100  | -0.16499800 |
| H  | -5.00336300 | 4.49049000  | -0.00885300 |
| C  | 4.71576600  | -3.52443700 | -0.17044700 |
| C  | -0.06466300 | -4.57234000 | -0.87758900 |
| N  | -2.05463800 | -3.17558600 | -0.46530100 |
| O  | 0.01969900  | -0.03025300 | -0.30680900 |
| H  | -3.70993500 | -5.47840800 | 0.31486500  |
| Mg | 1.82932800  | 1.06744800  | -0.59683600 |
| C  | 1.16179700  | 3.97829900  | -1.02573800 |
| H  | 1.68534400  | -5.80775900 | -1.04832400 |
| C  | -0.81871300 | 5.32835600  | -0.71099200 |
| H  | 3.32796900  | 5.56278500  | -0.96990700 |
| N  | 2.16404600  | 3.09710100  | -0.50287600 |
| C  | 0.93023500  | -5.41539000 | -0.37159600 |
| C  | 4.11588300  | -0.79706200 | -0.00615800 |
| C  | -1.04733100 | -4.07594300 | 0.01145600  |
| C  | -4.41982100 | 1.20529900  | 0.71543900  |
| H  | -6.65301300 | 0.07749900  | 1.93368500  |
| C  | -4.76197700 | 2.54916700  | 0.89256200  |
| N  | 3.72334500  | 0.58027200  | 0.04311500  |
| H  | -1.58233100 | 5.74599500  | -0.05997200 |
| C  | 0.18440900  | 4.52539400  | -0.16174100 |
| C  | 4.22214000  | -2.98667800 | 1.01266600  |
| C  | 3.28889300  | 3.62590700  | -0.01416700 |
| H  | 6.50647200  | 0.51258600  | 0.12655100  |
| C  | 3.44455100  | 5.13069600  | 0.02958900  |
| C  | 4.60934800  | 1.49107500  | 0.45383000  |
| H  | -0.69767000 | 2.25098200  | 1.14348800  |
| C  | 3.92202400  | -1.62600600 | 1.12284300  |
| H  | -5.06690900 | 2.89467300  | 1.87773500  |
| H  | -6.02723400 | 1.25447900  | 3.09472800  |
| C  | 4.38262000  | 2.87964100  | 0.46342700  |
| C  | -5.82822600 | 0.28409200  | 2.62452900  |
| H  | 4.06318400  | -3.63772600 | 1.86853300  |
| H  | 4.42341700  | 5.41607400  | 0.42087200  |
| C  | 0.97291800  | -5.76315700 | 0.97282400  |
| H  | -4.30035900 | -0.75319500 | 1.54714300  |
| C  | -4.46743700 | 0.26542900  | 1.91258200  |
| H  | 2.67202300  | 5.58816100  | 0.65691900  |
| C  | 5.97337600  | 1.03763700  | 0.92673500  |
| C  | -1.02014700 | -4.43218800 | 1.38190400  |
| H  | -2.84170000 | -3.41083100 | 1.81076400  |

|   |             |             |            |
|---|-------------|-------------|------------|
| H | -1.86922100 | 3.53193900  | 1.45474500 |
| H | 5.20672700  | 3.47225700  | 0.84315400 |
| H | 1.28821700  | -1.14413900 | 1.84085400 |
| C | -0.85861700 | 3.18322400  | 1.69562500 |
| H | 1.75562500  | -6.41993700 | 1.34480400 |
| C | 0.19196000  | 4.24220300  | 1.33378700 |
| H | 6.58199500  | 1.88464000  | 1.25071100 |
| H | -5.85272800 | -0.47388100 | 3.41683500 |
| H | 1.17328300  | 3.82865600  | 1.59055500 |
| C | 0.00234600  | -5.26982100 | 1.83716300 |
| H | 1.83239500  | -2.58011900 | 2.71151600 |
| H | 5.88751300  | 0.33020800  | 1.75810700 |
| C | -2.06170300 | -3.93248200 | 2.37479100 |
| C | 1.92921300  | -1.48958900 | 2.65894300 |
| H | -1.02439300 | -2.06278100 | 2.83648900 |
| C | 3.39055500  | -1.07589800 | 2.43842400 |
| H | 3.41566200  | 0.01767500  | 2.37648900 |
| H | -3.14904400 | -5.83680600 | 2.47210500 |
| H | -0.82261700 | 2.95516800  | 2.76841100 |
| H | -1.01141300 | 5.92335000  | 2.06949900 |
| C | -3.34415400 | 0.58520500  | 2.90997900 |
| H | -3.45182000 | 1.59970500  | 3.31236200 |
| C | -0.00438300 | 5.50524300  | 2.18349000 |
| H | 0.71281400  | 6.29077900  | 1.91871500 |
| H | -2.35849000 | 0.52066000  | 2.43731300 |
| C | -1.45468700 | -2.92291000 | 3.35913800 |
| H | 0.03412500  | -5.54661900 | 2.88868100 |
| C | -2.73408500 | -5.07885000 | 3.14540900 |
| H | 1.54551100  | -1.06829200 | 3.59684100 |
| H | -2.21842200 | -2.55296900 | 4.05413000 |
| H | -3.55205300 | -4.69186400 | 3.76519900 |
| H | 4.20794600  | -2.56548200 | 3.82539700 |
| H | -3.36422700 | -0.11478300 | 3.75404400 |
| H | 5.30552200  | -1.21742400 | 3.49868100 |
| C | 4.25234900  | -1.48568100 | 3.64112700 |
| H | -0.65625100 | -3.38403000 | 3.95279100 |
| H | 0.12934300  | 5.26812000  | 3.24570800 |
| H | -2.02858700 | -5.58514000 | 3.81496600 |
| H | 3.89521600  | -0.98516900 | 4.54919900 |

$^{oxo}TS_{II-III}$

$H = -3065.064714 \text{ au}$

$G = -3065.260645 \text{ au}$

$GD3BJ = -0.4193990456 \text{ au}$

|    |             |             |             |
|----|-------------|-------------|-------------|
| Mg | 1.29877000  | 5.73892500  | 9.85161500  |
| N  | 1.40813100  | 7.79687800  | 9.49762700  |
| C  | 0.55491600  | 9.95074000  | 8.64568100  |
| H  | 1.05807700  | 10.50021700 | 9.44481400  |
| H  | -0.40963300 | 10.42206600 | 8.44341700  |
| H  | 1.18076800  | 10.06058400 | 7.75156600  |
| N  | -0.67033200 | 5.56140400  | 9.14882000  |
| C  | 0.38277700  | 8.48423200  | 8.98736300  |
| C  | -0.87643100 | 7.94312700  | 8.66872000  |
| H  | -1.58135100 | 8.66184100  | 8.26693100  |
| C  | -1.34401100 | 6.61581700  | 8.67740600  |
| C  | -2.69984100 | 6.41461500  | 8.03008400  |
| H  | -2.57762400 | 5.93226000  | 7.05242100  |
| H  | -3.20693800 | 7.36958800  | 7.87472800  |
| H  | -3.34692200 | 5.75985600  | 8.61793100  |
| C  | 2.65885300  | 8.48688600  | 9.62884700  |
| C  | 3.00725900  | 9.12266200  | 10.84246700 |

|    |             |             |             |   |             |             |             |
|----|-------------|-------------|-------------|---|-------------|-------------|-------------|
| C  | 4.23534900  | 9.78918400  | 10.92218400 | H | 8.64795300  | 2.74255300  | 10.59321500 |
| H  | 4.50645900  | 10.29360100 | 11.84702400 | C | 6.63371500  | 1.98385800  | 10.71922300 |
| C  | 5.11320100  | 9.82194400  | 9.84605700  | C | 6.14030300  | 0.98982100  | 11.58238200 |
| H  | 6.06213400  | 10.34673300 | 9.92804000  | H | 6.82716700  | 0.17460400  | 11.77949800 |
| C  | 4.76735100  | 9.17950100  | 8.66179900  | C | 4.92525300  | 0.92274800  | 12.28886600 |
| H  | 5.45825000  | 9.20103300  | 7.82327500  | C | 4.72986900  | -0.32085300 | 13.13375100 |
| C  | 3.54556000  | 8.51609000  | 8.52542800  | H | 4.28501100  | -0.09524700 | 14.10589000 |
| C  | 2.09011000  | 9.12211800  | 12.05718000 | H | 5.67659500  | -0.84417700 | 13.28842900 |
| H  | 1.21656700  | 8.50951700  | 11.81044700 | H | 4.04456200  | -1.01053700 | 12.62505700 |
| C  | 2.77855700  | 8.49816100  | 13.27945900 | C | 6.58262600  | 3.95599000  | 9.40287700  |
| H  | 3.17173700  | 7.50166600  | 13.05457600 | C | 6.69378500  | 3.69815800  | 8.01683000  |
| H  | 2.07517800  | 8.41361600  | 14.11722900 | C | 7.29657100  | 4.66359100  | 7.20454100  |
| H  | 3.62034600  | 9.11263600  | 13.62069200 | H | 7.38682900  | 4.47944600  | 6.13671500  |
| C  | 1.58292300  | 10.52985200 | 12.40772000 | C | 7.78248200  | 5.85435400  | 7.73345300  |
| H  | 2.41259300  | 11.20017500 | 12.66295200 | H | 8.24814900  | 6.59163600  | 7.08373400  |
| H  | 0.91025900  | 10.48855400 | 13.27331300 | C | 7.67732400  | 6.09199800  | 9.09935900  |
| H  | 1.03099600  | 10.98470800 | 11.57880700 | H | 8.06372800  | 7.02073700  | 9.51073400  |
| C  | 3.19932200  | 7.82571100  | 7.21420900  | H | 7.09142500  | 5.15427600  | 9.95433200  |
| H  | 2.11522000  | 7.66920800  | 7.19703200  | C | 6.16470200  | 2.41389500  | 7.39309200  |
| C  | 3.86531100  | 6.44420600  | 7.14073400  | H | 5.95259500  | 1.71091700  | 8.20570500  |
| H  | 4.95714000  | 6.53580900  | 7.13613900  | C | 7.17610200  | 1.74118200  | 6.45437200  |
| H  | 3.56470300  | 5.91989600  | 6.22488000  | H | 7.35845300  | 2.33968900  | 5.55400500  |
| H  | 3.59952300  | 5.81694500  | 8.00025700  | H | 6.79430800  | 0.76757100  | 6.12442800  |
| C  | 3.55106200  | 8.66184300  | 5.97691300  | H | 8.14333600  | 1.57681800  | 6.94287300  |
| H  | 3.11951400  | 9.66826700  | 6.02947000  | C | 4.84220200  | 2.66805900  | 6.65774100  |
| H  | 3.16522400  | 8.17435000  | 5.07352900  | H | 4.09847100  | 3.11734800  | 7.32274800  |
| H  | 4.63441000  | 8.76868600  | 5.84700800  | H | 4.42930400  | 1.73087800  | 6.26392500  |
| C  | -1.29661500 | 4.27674500  | 9.01030500  | H | 4.98967700  | 3.35327000  | 5.81393000  |
| C  | -2.13063800 | 3.77251100  | 10.03624200 | C | 7.00319000  | 5.42707800  | 11.44842500 |
| C  | -2.73911900 | 2.52545800  | 9.85466500  | H | 6.82493300  | 4.46571800  | 11.94385400 |
| H  | -3.39368400 | 2.13753500  | 10.63203800 | C | 5.81526000  | 6.34635900  | 11.76865300 |
| C  | -2.52784900 | 1.77440400  | 8.70527500  | H | 5.95220400  | 7.33520100  | 11.31713400 |
| H  | -3.00999800 | 0.80731600  | 8.58471500  | H | 5.71089500  | 6.47979400  | 12.85287100 |
| C  | -1.69134900 | 2.27001500  | 7.71208300  | H | 4.86708600  | 5.95522100  | 11.37607200 |
| H  | -1.52184300 | 1.67977000  | 6.81484500  | C | 8.30037500  | 5.99972000  | 12.03392900 |
| C  | -1.07382000 | 3.51772400  | 7.83710700  | H | 8.50721500  | 7.01058100  | 11.66346400 |
| C  | -2.40099600 | 4.53955900  | 11.32334400 | H | 9.16459500  | 5.37036600  | 11.79234000 |
| H  | -1.78939100 | 5.44684000  | 11.30238100 | H | 8.22288100  | 6.06515100  | 13.12590100 |
| C  | -1.99483500 | 3.72241900  | 12.55836100 | C | 2.86207800  | 1.73074000  | 13.13696700 |
| H  | -2.63583500 | 2.84089400  | 12.68004100 | C | 1.73376500  | 0.96706800  | 12.76331400 |
| H  | -2.09610300 | 4.32708100  | 13.46814900 | C | 0.65767000  | 0.88821000  | 13.65286500 |
| H  | -0.96143100 | 3.36925000  | 12.49269800 | H | -0.21938900 | 0.30694000  | 13.38029400 |
| C  | -3.86993500 | 4.97402400  | 11.44875500 | C | 0.69040500  | 1.53446100  | 14.88343900 |
| H  | -4.18211500 | 5.61514700  | 10.61810900 | H | -0.15254700 | 1.45372500  | 15.56557600 |
| H  | -4.02202300 | 5.53625100  | 12.37838100 | C | 1.80365300  | 2.28990500  | 15.23606800 |
| H  | -4.54124500 | 4.10682600  | 11.47165300 | H | 1.81480300  | 2.79874000  | 16.19593000 |
| C  | -0.16518200 | 4.01568000  | 6.72327400  | C | 2.90059500  | 2.41286400  | 14.37751000 |
| H  | 0.00946600  | 5.08483100  | 6.88751600  | C | 1.66495300  | 0.26571600  | 11.41477900 |
| C  | 1.19701000  | 3.31034900  | 6.78791200  | H | 2.68833900  | 0.18887800  | 11.03057800 |
| H  | 1.08203200  | 2.22917600  | 6.64019900  | C | 0.86221800  | 1.10206200  | 10.40835800 |
| H  | 1.68333900  | 3.46386200  | 7.75856100  | H | -0.18399900 | 1.19365100  | 10.72076300 |
| H  | 1.86613400  | 3.68814600  | 6.00554800  | H | 0.87215900  | 0.63128300  | 9.41766900  |
| C  | -0.78450300 | 3.86773400  | 5.32713100  | H | 1.26424200  | 2.11772300  | 10.31006100 |
| H  | -0.89681900 | 2.81626400  | 5.03764900  | C | 1.10552900  | -1.15995400 | 11.50305500 |
| H  | -0.14014200 | 4.34281200  | 4.57766400  | H | 1.64254400  | -1.76407100 | 12.24375500 |
| H  | -1.77364800 | 4.33626700  | 5.26974100  | H | 1.19229100  | -1.65785900 | 10.52986900 |
| Mg | 3.94585900  | 3.38211400  | 10.82662500 | H | 0.04331100  | -1.16662000 | 11.77425200 |
| N  | 5.92282200  | 3.02053900  | 10.26417300 | C | 4.10898400  | 3.24825500  | 14.78635900 |
| N  | 3.97278600  | 1.85698100  | 12.24379300 | H | 4.56270300  | 3.62985700  | 13.86213700 |
| C  | 8.08734000  | 1.84181100  | 10.31844100 | C | 5.18152000  | 2.40744400  | 15.49922000 |
| H  | 8.20005400  | 1.72480300  | 9.23611700  | H | 4.76523400  | 1.92526200  | 16.39261800 |
| H  | 8.54853600  | 0.98237500  | 10.80989700 | H | 6.01489400  | 3.04560400  | 15.81909300 |

|   |            |            |             |
|---|------------|------------|-------------|
| H | 5.59282300 | 1.62888600 | 14.85150300 |
| C | 3.75044100 | 4.45836100 | 15.65685100 |
| H | 2.93925100 | 5.04505300 | 15.21721700 |
| H | 4.62683300 | 5.10827100 | 15.76532400 |
| H | 3.44889100 | 4.15967700 | 16.66835300 |
| O | 2.60805200 | 4.52969800 | 10.31565200 |
| C | 1.20165800 | 5.43486000 | 13.15429500 |
| O | 0.54062900 | 5.98119000 | 12.40264100 |

### III

$H = -2951.823096 \text{ au}$

$G = -2952.014852 \text{ au}$

$GD3BJ = -0.406264338 \text{ au}$

|    |             |             |             |
|----|-------------|-------------|-------------|
| Mg | 1.43019400  | 5.79081000  | 9.64603400  |
| N  | 1.46660100  | 7.83550300  | 9.27503700  |
| C  | 0.53373100  | 10.02140300 | 8.63038200  |
| H  | 0.86613000  | 10.53281800 | 9.53996400  |
| H  | -0.41614200 | 10.45636800 | 8.31271500  |
| H  | 1.28742800  | 10.23361200 | 7.86410300  |
| N  | -0.56140600 | 5.61228300  | 9.07295400  |
| C  | 0.40373300  | 8.53074500  | 8.86222600  |
| C  | -0.86704800 | 7.98097100  | 8.61671800  |
| H  | -1.61879500 | 8.69515500  | 8.30164600  |
| C  | -1.31966800 | 6.65328800  | 8.71667900  |
| C  | -2.78342800 | 6.43279600  | 8.39720000  |
| H  | -2.90640500 | 5.70993500  | 7.58399600  |
| H  | -3.27013500 | 7.36713700  | 8.10885400  |
| H  | -3.31205100 | 6.01725600  | 9.26246800  |
| C  | 2.69300300  | 8.54835400  | 9.47307300  |
| C  | 2.98422400  | 9.10792900  | 10.73766000 |
| C  | 4.20957300  | 9.75751200  | 10.91462300 |
| H  | 4.44802500  | 10.19159800 | 11.88241300 |
| C  | 5.12913700  | 9.85939400  | 9.87640800  |
| H  | 6.07598800  | 10.37080600 | 10.03295800 |
| C  | 4.82840300  | 9.30919300  | 8.63509200  |
| H  | 5.54950500  | 9.39324600  | 7.82625300  |
| C  | 3.61368100  | 8.65691200  | 8.40642400  |
| C  | 2.00620400  | 8.99605400  | 11.89823900 |
| H  | 1.03403600  | 8.70724200  | 11.48372500 |
| C  | 2.43927700  | 7.88482700  | 12.86566200 |
| H  | 2.55033100  | 6.92466300  | 12.34841700 |
| H  | 1.70380100  | 7.75916100  | 13.67002900 |
| H  | 3.40608400  | 8.12424400  | 13.32511500 |
| C  | 1.80421300  | 10.32009800 | 12.64646800 |
| H  | 2.71059000  | 10.63636000 | 13.17615700 |
| H  | 1.01182300  | 10.21190500 | 13.39681600 |
| H  | 1.51701300  | 11.12978900 | 11.96567700 |
| C  | 3.30549800  | 8.06413000  | 7.03977600  |
| H  | 2.22284600  | 7.90425500  | 6.98763100  |
| C  | 3.98115400  | 6.69507800  | 6.87781000  |
| H  | 5.07233500  | 6.79030800  | 6.90512400  |
| H  | 3.70191200  | 6.23568700  | 5.92104400  |
| H  | 3.70555000  | 6.00550300  | 7.68426500  |
| C  | 3.68255100  | 8.99288600  | 5.87876000  |
| H  | 3.23168400  | 9.98581400  | 5.99032700  |
| H  | 3.33514300  | 8.56759900  | 4.92954900  |
| H  | 4.76765400  | 9.12590900  | 5.79482800  |
| C  | -1.18854100 | 4.32587600  | 9.13494100  |
| C  | -1.76274600 | 3.89483600  | 10.35362800 |
| C  | -2.34249200 | 2.62480100  | 10.40758600 |
| H  | -2.78560300 | 2.27952000  | 11.33780000 |

|    |             |             |             |
|----|-------------|-------------|-------------|
| C  | -2.37029800 | 1.79567400  | 9.29040000  |
| H  | -2.83298200 | 0.81335700  | 9.34974100  |
| C  | -1.80474700 | 2.23138100  | 8.09799300  |
| H  | -1.82688300 | 1.57999300  | 7.22724600  |
| C  | -1.20856500 | 3.49252100  | 7.99458500  |
| C  | -1.73730200 | 4.78498600  | 11.58746000 |
| H  | -1.59715800 | 5.81669300  | 11.24517900 |
| C  | -0.54454300 | 4.43058500  | 12.48806000 |
| H  | -0.64591700 | 3.41576300  | 12.88784100 |
| H  | -0.48140600 | 5.12438600  | 13.33606200 |
| H  | 0.40927200  | 4.46210300  | 11.94637500 |
| C  | -3.04502300 | 4.75159600  | 12.38806300 |
| H  | -3.91496100 | 4.96069300  | 11.75452300 |
| H  | -3.01605400 | 5.50555600  | 13.18368400 |
| H  | -3.20730000 | 3.78065500  | 12.87073600 |
| C  | -0.59514600 | 3.92648200  | 6.67106800  |
| H  | -0.31928900 | 4.98237700  | 6.76464900  |
| C  | 0.68897300  | 3.13822000  | 6.37685900  |
| H  | 0.47566800  | 2.06809300  | 6.26424500  |
| H  | 1.41789500  | 3.24573800  | 7.18659200  |
| H  | 1.15484800  | 3.48838400  | 5.44732600  |
| C  | -1.57648600 | 3.81064400  | 5.49606300  |
| H  | -1.84638600 | 2.76774200  | 5.29244000  |
| H  | -1.12344600 | 4.21535300  | 4.58292600  |
| H  | -2.50430900 | 4.36186400  | 5.68523600  |
| Mg | 3.92581700  | 3.43659100  | 10.93530200 |
| N  | 5.93759900  | 3.13759100  | 10.50272100 |
| N  | 3.87432600  | 1.86884800  | 12.30318500 |
| C  | 8.13022900  | 2.02632400  | 10.65931700 |
| H  | 8.23343900  | 1.85699600  | 9.58181900  |
| H  | 8.60264900  | 1.19607800  | 11.18878900 |
| H  | 8.68544300  | 2.94400700  | 10.88240600 |
| C  | 6.67357400  | 2.16650300  | 11.04954600 |
| C  | 6.19842200  | 1.22915000  | 11.98419200 |
| H  | 6.93215100  | 0.50224500  | 12.31258000 |
| C  | 4.92266200  | 1.07986500  | 12.55635000 |
| C  | 4.76678700  | -0.07790000 | 13.52002100 |
| H  | 4.44678900  | 0.27079200  | 14.50745200 |
| H  | 5.70380400  | -0.62763700 | 13.63167500 |
| H  | 3.99417400  | -0.77285200 | 13.17257100 |
| C  | 6.58175100  | 4.01072400  | 9.56771900  |
| C  | 6.57072200  | 3.69572400  | 8.19063400  |
| C  | 7.17472000  | 4.58503900  | 7.29670800  |
| H  | 7.17396000  | 4.35575100  | 6.23397700  |
| C  | 7.78036700  | 5.75501000  | 7.74118100  |
| H  | 8.24940800  | 6.43170000  | 7.03085700  |
| C  | 7.78784300  | 6.05219300  | 9.09976400  |
| H  | 8.26337600  | 6.96727100  | 9.44224000  |
| C  | 7.20057100  | 5.19322100  | 10.03274300 |
| C  | 5.90387400  | 2.43027800  | 7.67243000  |
| H  | 5.73900800  | 1.76923200  | 8.53016700  |
| C  | 6.76913700  | 1.66104100  | 6.66561400  |
| H  | 6.90096100  | 2.21599700  | 5.72930200  |
| H  | 6.29258600  | 0.70657600  | 6.41202300  |
| H  | 7.76558800  | 1.44566200  | 7.06826900  |
| C  | 4.52827700  | 2.75153600  | 7.07042500  |
| H  | 3.88506300  | 3.26428000  | 7.79479600  |
| H  | 4.01999900  | 1.83475100  | 6.74670900  |
| H  | 4.63087800  | 3.40828200  | 6.19802500  |
| C  | 7.21115400  | 5.54091700  | 11.51394900 |
| H  | 7.04081300  | 4.61298900  | 12.07125500 |
| C  | 6.05625100  | 6.49585300  | 11.84774100 |

|   |             |             |             |
|---|-------------|-------------|-------------|
| H | 6.17829600  | 7.45362700  | 11.33026300 |
| H | 6.01248900  | 6.69190300  | 12.92668800 |
| H | 5.08812000  | 6.09001400  | 11.53125700 |
| C | 8.54756300  | 6.11797100  | 11.99595700 |
| H | 8.74518600  | 7.10923700  | 11.57130500 |
| H | 9.38900100  | 5.46682300  | 11.73231900 |
| H | 8.53541100  | 6.23131600  | 13.08656700 |
| C | 2.64035600  | 1.56216500  | 12.96350200 |
| C | 1.71244700  | 0.70119200  | 12.33251200 |
| C | 0.49654300  | 0.44450800  | 12.97215900 |
| H | -0.22737600 | -0.21236800 | 12.49747400 |
| C | 0.19871600  | 1.00697800  | 14.20923500 |
| H | -0.74974100 | 0.78950400  | 14.69477800 |
| C | 1.12210200  | 1.84558300  | 14.82269500 |
| H | 0.88548400  | 2.28156800  | 15.79040000 |
| C | 2.35091300  | 2.13638400  | 14.22147400 |
| C | 2.01958800  | 0.07679800  | 10.97927800 |
| H | 3.10704900  | 0.10276100  | 10.84604800 |
| C | 1.39649800  | 0.90377000  | 9.84488800  |
| H | 0.30277700  | 0.88883600  | 9.90454600  |
| H | 1.68815500  | 0.49973900  | 8.86710800  |
| H | 1.70067000  | 1.95703800  | 9.88719800  |
| C | 1.59025100  | -1.39186300 | 10.87567400 |
| H | 2.00150600  | -1.99406800 | 11.69430500 |
| H | 1.94469000  | -1.81856900 | 9.92975800  |
| H | 0.49990800  | -1.50508900 | 10.89085900 |
| C | 3.33364300  | 3.06176300  | 14.92432100 |
| H | 4.29177500  | 2.98857200  | 14.39811500 |
| C | 3.58276100  | 2.66701300  | 16.38669700 |
| H | 2.68625400  | 2.79971700  | 17.00350900 |
| H | 4.37104200  | 3.29490200  | 16.81898400 |
| H | 3.89592700  | 1.62081000  | 16.47750600 |
| C | 2.86856600  | 4.52238300  | 14.83450300 |
| H | 2.73026800  | 4.83514800  | 13.79403900 |
| H | 3.60132200  | 5.19366300  | 15.29945900 |
| H | 1.91002500  | 4.65960600  | 15.34989900 |
| O | 2.67823100  | 4.61493400  | 10.29025400 |

**oxoTS<sub>III-IV</sub>**

*H* = -3140.311991 au

*G* = -3140.504754 au

*GD3BJ* = -0.4258044608 au

|   |             |             |             |
|---|-------------|-------------|-------------|
| H | -3.17283300 | 2.19822000  | -4.80295500 |
| H | -3.82653400 | 3.50775700  | -3.81534000 |
| C | -3.71343000 | 2.41894900  | -3.87472900 |
| H | -4.71700600 | 1.98607100  | -3.95686700 |
| H | 3.04490900  | 3.75586200  | -4.08364400 |
| H | 1.80996800  | 5.01771300  | -4.05579400 |
| H | 5.22271600  | 0.24985600  | -3.56851400 |
| H | -1.00232300 | 2.35969200  | -3.49757800 |
| H | 5.75242900  | -1.37083400 | -3.10878700 |
| H | 1.18380600  | -4.79373900 | -3.66529300 |
| C | 2.16940400  | 4.12245500  | -3.53410200 |
| H | 4.44824500  | 5.30545200  | -2.67004200 |
| H | 3.16332600  | 6.49533300  | -2.39065200 |
| C | 5.06799200  | -0.55665400 | -2.84137900 |
| H | 1.38181900  | 3.36513500  | -3.59779500 |
| H | 4.04644500  | -0.93226400 | -2.95764800 |
| H | -1.64380100 | 3.59562900  | -2.39726100 |
| H | 7.04068400  | 1.13403300  | -2.05903300 |
| C | 3.59011800  | 5.55059900  | -2.03167300 |

|    |             |             |             |
|----|-------------|-------------|-------------|
| C  | -1.56086100 | 2.51702200  | -2.56654300 |
| H  | -5.23145600 | 0.07220900  | -2.73266300 |
| C  | -2.94226600 | 1.85996100  | -2.67087600 |
| H  | -2.78693300 | 0.79006000  | -2.84960400 |
| H  | 2.02764400  | -2.59025300 | -2.71192300 |
| H  | 0.55205200  | 6.16180200  | -2.62881600 |
| C  | 1.02119900  | -5.14059000 | -2.63777700 |
| H  | 0.23042600  | -5.89940000 | -2.65767900 |
| H  | 7.46775400  | -0.44950400 | -1.38430700 |
| H  | 1.94511800  | -5.63177600 | -2.31136700 |
| C  | 2.54657000  | 4.42277700  | -2.07664200 |
| H  | -5.86252000 | -1.58302300 | -2.59725300 |
| C  | 6.78646000  | 0.40417300  | -1.28013400 |
| O  | 0.40448200  | -0.19213000 | -3.21872000 |
| H  | -4.09459800 | 4.09182400  | -1.67888000 |
| H  | 3.96696000  | 5.71680700  | -1.01774400 |
| H  | -0.98842600 | 2.09590700  | -1.73230400 |
| H  | 6.01743700  | -2.65186600 | -1.31748600 |
| C  | -5.37123000 | -0.77418000 | -2.05213700 |
| H  | -4.41793000 | -3.12015000 | -2.32187800 |
| H  | -0.21270300 | -3.45950200 | -2.18420100 |
| O  | 2.07233900  | 0.96989700  | -2.06653000 |
| C  | 5.32165200  | -0.04129500 | -1.41774500 |
| C  | 0.39889100  | 5.68094100  | -1.66555200 |
| C  | 1.79946600  | -2.93443000 | -1.69534700 |
| H  | 3.01639100  | 3.52512800  | -1.66207000 |
| C  | 0.65519900  | -3.95482700 | -1.73482400 |
| H  | 2.70920900  | -3.37244700 | -1.27136400 |
| H  | -3.66867200 | -5.08856800 | -2.01965600 |
| C  | -3.69928100 | 2.00344000  | -1.36070600 |
| H  | 4.69395600  | 0.84295900  | -1.26672200 |
| C  | 1.18189900  | 0.36685700  | -2.55644100 |
| H  | -1.43368600 | 6.74407700  | -1.27888200 |
| C  | -4.23078100 | 3.24724900  | -1.00826600 |
| H  | 6.98050200  | 0.87182000  | -0.30987000 |
| H  | -6.04582100 | -0.42747600 | -1.26247800 |
| C  | -3.71633900 | -2.57833400 | -1.69854700 |
| C  | 1.33165100  | 4.74102800  | -1.21410200 |
| C  | -4.04781100 | -1.22900800 | -1.47347600 |
| H  | -1.91249900 | -5.26018700 | -1.81007900 |
| H  | 1.53276200  | -2.06864900 | -1.07780200 |
| C  | 5.40235000  | -2.37595100 | -0.46419400 |
| C  | -0.71900900 | 6.01254500  | -0.90899300 |
| C  | -2.82798800 | -4.86233900 | -1.36022900 |
| C  | 4.93936600  | -1.06048900 | -0.35142400 |
| C  | -2.71217600 | -3.37270500 | -1.11323600 |
| N  | -3.29580600 | -0.36549400 | -0.78337500 |
| C  | -3.86747700 | 0.91419600  | -0.47493800 |
| Mg | -1.31444300 | -0.85224600 | -0.33441900 |
| H  | 5.46122700  | -4.35451300 | 0.38396600  |
| C  | -4.93223100 | 3.42464100  | 0.17862900  |
| H  | -5.34610600 | 4.39790900  | 0.43131600  |
| C  | 5.09318400  | -3.33679600 | 0.49133500  |
| C  | 0.27128600  | -4.37291300 | -0.32477400 |
| N  | -1.71388900 | -2.90310000 | -0.35831000 |
| O  | 0.22344200  | 0.13816000  | -0.08606200 |
| H  | -2.97059000 | -5.40358900 | -0.41912000 |
| Mg | 1.78294700  | 1.13939700  | 0.16583800  |
| C  | 1.13141300  | 4.14296800  | 0.05372700  |
| H  | 1.97917200  | -5.65870800 | -0.10674200 |
| C  | -0.91527500 | 5.40380200  | 0.32578400  |
| H  | 2.86942600  | 5.75765500  | 0.93168100  |

|   |             |             |            |
|---|-------------|-------------|------------|
| N | 2.07665700  | 3.18270800  | 0.53984700 |
| C | 1.08417100  | -5.27087400 | 0.37255000 |
| C | 4.15989900  | -0.71116100 | 0.77793800 |
| C | -0.88253200 | -3.86081800 | 0.31295400 |
| C | -4.57973300 | 1.08379400  | 0.73588600 |
| H | -6.77193600 | -0.62794800 | 0.92540000 |
| C | -5.10392400 | 2.34530600  | 1.03677800 |
| N | 3.67460400  | 0.62965100  | 0.91620700 |
| H | -1.79364500 | 5.66028200  | 0.91213700 |
| C | -0.00033200 | 4.47758100  | 0.83422700 |
| C | 4.31225300  | -2.98623400 | 1.58733100 |
| C | 3.05374000  | 3.62767000  | 1.33452600 |
| H | 6.25335500  | 0.33838400  | 1.73950300 |
| C | 3.07511500  | 5.08135100  | 1.76510400 |
| C | 4.40007300  | 1.47649100  | 1.65198600 |
| H | -0.93444300 | 1.92965400  | 1.42712900 |
| C | 3.84560500  | -1.68003900 | 1.76014200 |
| H | -5.65923600 | 2.48238000  | 1.96218100 |
| H | -6.84768200 | 0.46433000  | 2.31461400 |
| C | 4.09383800  | 2.83484200  | 1.85255100 |
| C | -6.30009400 | -0.38204300 | 1.88279900 |
| H | 4.06694200  | -3.74089900 | 2.32985500 |
| H | 4.03864500  | 5.34575600  | 2.20680100 |
| C | 0.76942500  | -5.68006700 | 1.66336400 |
| H | -4.31982400 | -0.94960300 | 1.30729400 |
| C | -4.80757400 | -0.05834800 | 1.71594800 |
| H | 2.29665600  | 5.26575100  | 2.51535100 |
| C | 5.63928100  | 0.98308700  | 2.37313700 |
| C | -1.21297600 | -4.27185700 | 1.62540000 |
| H | -2.97351400 | -3.07602600 | 1.68197400 |
| H | -2.23607700 | 3.08540900  | 1.76390000 |
| H | 4.78881800  | 3.36451200  | 2.49415800 |
| H | 1.10197400  | -1.30684200 | 1.92159400 |
| C | -1.26658000 | 2.71520100  | 2.11635300 |
| H | 1.40960500  | -6.38628600 | 2.18662200 |
| C | -0.23922100 | 3.85247900  | 2.20127000 |
| H | 6.24861100  | 1.81966200  | 2.72307200 |
| H | -6.43326100 | -1.24013000 | 2.55295200 |
| H | 0.70652900  | 3.41035100  | 2.53384600 |
| C | -0.37365900 | -5.18219100 | 2.27633700 |
| H | 1.48489600  | -2.86101800 | 2.68215100 |
| H | 5.35508500  | 0.38388500  | 3.24669000 |
| C | -2.45406300 | -3.77073400 | 2.35065800 |
| C | 1.55443400  | -1.77417400 | 2.80442600 |
| H | -1.44740800 | -2.14167300 | 3.40733000 |
| C | 3.01294100  | -1.33156200 | 2.98543200 |
| H | 3.01020100  | -0.24064900 | 3.08532600 |
| H | -3.73108500 | -5.45783500 | 1.77639900 |
| H | -1.41429400 | 2.26565500  | 3.10691100 |
| H | -1.66136600 | 5.27943700  | 3.07146700 |
| C | -4.17104100 | 0.23683200  | 3.08150400 |
| H | -4.60604100 | 1.13226500  | 3.54112800 |
| C | -0.65874100 | 4.87903900  | 3.26279200 |
| H | 0.03442300  | 5.72725000  | 3.30923600 |
| H | -3.09223800 | 0.40202500  | 2.99237600 |
| C | -2.08566400 | -3.00345600 | 3.62832600 |
| H | -0.62358200 | -5.50713500 | 3.28387000 |
| C | -3.42871800 | -4.91258100 | 2.67697400 |
| H | 0.96286400  | -1.49309000 | 3.68537200 |
| H | -2.98780500 | -2.63937500 | 4.13362100 |
| H | -4.33583000 | -4.51786400 | 3.15067300 |
| H | 3.51579100  | -2.99826800 | 4.32122100 |

|   |             |             |            |
|---|-------------|-------------|------------|
| H | -4.33277900 | -0.60021800 | 3.77081600 |
| H | 4.64868600  | -1.64137800 | 4.41479300 |
| C | 3.59235100  | -1.90515700 | 4.28590500 |
| H | -1.54458600 | -3.64246600 | 4.33627900 |
| H | -0.68391000 | 4.40625500  | 4.25196800 |
| H | -2.98184600 | -5.63683500 | 3.36873400 |
| H | 3.03696600  | -1.51519800 | 5.14733600 |

#### IV

$H = -3140.392466 \text{ au}$

$G = -3140.585003 \text{ au}$

$GD3BJ = -0.4155274411 \text{ au}$

|   |             |             |             |
|---|-------------|-------------|-------------|
| H | -3.76553700 | 1.32497800  | -5.00989500 |
| H | -4.60970100 | 2.61953000  | -4.14334400 |
| C | -4.24349800 | 1.58895200  | -4.05880000 |
| H | -5.11333600 | 0.93609800  | -3.92850300 |
| H | 2.87646900  | 3.40424300  | -4.21109700 |
| H | 1.30971100  | 4.22673000  | -4.20347300 |
| H | 4.83366500  | 0.19889600  | -3.72680100 |
| H | -1.49841800 | 1.98776200  | -4.08110000 |
| H | 4.89332600  | -1.51954300 | -3.30950600 |
| H | 0.23740200  | -5.04008900 | -3.88673200 |
| C | 1.98587100  | 3.60600500  | -3.60303000 |
| H | 4.06585600  | 5.36431200  | -3.20081000 |
| H | 2.56857200  | 6.30818300  | -3.18653700 |
| C | 4.54974200  | -0.53671100 | -2.96391800 |
| H | 1.49100000  | 2.65127600  | -3.40350000 |
| H | 3.45794700  | -0.55414100 | -2.90335700 |
| H | -2.27587700 | 3.37427000  | -3.29653500 |
| H | 6.96236200  | 0.70844800  | -2.50305800 |
| C | 3.17268200  | 5.59824700  | -2.60875300 |
| C | -2.00566600 | 2.31949800  | -3.16856500 |
| H | -5.92457300 | -0.10620700 | -2.08936900 |
| C | -3.23989500 | 1.44769200  | -2.90321300 |
| H | -2.90637300 | 0.40551100  | -2.88592900 |
| H | 1.70943700  | -3.10199600 | -3.18416700 |
| H | 0.25686400  | 5.85987700  | -2.88491300 |
| C | 0.10133000  | -5.33398800 | -2.83894600 |
| H | -0.89052000 | -5.78926000 | -2.74528100 |
| H | 7.15516400  | -0.99529000 | -2.06353600 |
| H | 0.84552200  | -6.10656200 | -2.60909700 |
| C | 2.38559200  | 4.31463200  | -2.30041600 |
| H | -6.36203000 | -1.82608500 | -2.23081200 |
| C | 6.70577300  | -0.04554500 | -1.74902800 |
| O | -0.48452400 | -0.67188400 | -2.28412600 |
| H | -4.15876200 | 3.83123900  | -2.06344900 |
| H | 3.49850300  | 6.10786500  | -1.69513800 |
| H | -1.28607000 | 2.26613700  | -2.34679700 |
| H | 5.70464900  | -2.80753400 | -1.52620800 |
| C | -5.90089400 | -1.07489600 | -1.58478300 |
| H | -5.02856500 | -3.44677300 | -1.73831400 |
| H | -0.50004600 | -3.38368400 | -2.20805600 |
| O | 1.39551600  | 0.55754500  | -1.94430500 |
| C | 5.17953700  | -0.16617600 | -1.61335500 |
| C | 0.17058100  | 5.43982700  | -1.88543500 |
| C | 1.63162100  | -3.45782200 | -2.15095300 |
| H | 3.05577400  | 3.64366600  | -1.75188600 |
| C | 0.26386000  | -4.11246500 | -1.91988400 |
| H | 2.45290200  | -4.16193800 | -1.97384900 |
| H | -4.12005900 | -5.39500100 | -1.58319900 |
| C | -3.88206000 | 1.76159000  | -1.55942900 |

|    |             |             |             |
|----|-------------|-------------|-------------|
| H  | 4.79737900  | 0.82116900  | -1.33119300 |
| C  | 0.33931800  | -0.03647400 | -1.56146800 |
| H  | -1.71422500 | 6.40505200  | -1.49844900 |
| C  | -4.31070100 | 3.06833200  | -1.30403400 |
| H  | 7.17870800  | 0.24800900  | -0.80525900 |
| H  | -6.52232000 | -0.98158500 | -0.68647400 |
| C  | -4.21931100 | -2.86151500 | -1.31617200 |
| C  | 1.18205100  | 4.59791900  | -1.41077200 |
| C  | -4.49163100 | -1.48308800 | -1.21057300 |
| H  | -2.42619200 | -5.65898900 | -1.10284100 |
| H  | 1.78992600  | -2.60194200 | -1.48868400 |
| C  | 5.16311600  | -2.48882300 | -0.63853400 |
| C  | -0.93835400 | 5.75068300  | -1.10848200 |
| C  | -3.34765900 | -5.12543300 | -0.85869200 |
| C  | 4.79226100  | -1.14564000 | -0.51310800 |
| C  | -3.14063500 | -3.62576600 | -0.82846500 |
| N  | -3.62266500 | -0.56398500 | -0.77981600 |
| C  | -4.08941300 | 0.77434600  | -0.56683100 |
| Mg | -1.63776300 | -1.12133700 | -0.69315700 |
| H  | 5.15446100  | -4.45981600 | 0.22679200  |
| C  | -4.92843700 | 3.40951200  | -0.10733900 |
| H  | -5.25731900 | 4.43084200  | 0.06903900  |
| C  | 4.85736600  | -3.42059800 | 0.34543600  |
| C  | 0.04384400  | -4.47560500 | -0.45792400 |
| N  | -2.01092900 | -3.11852100 | -0.32660300 |
| O  | 0.06893100  | 0.01806300  | -0.23752500 |
| H  | -3.67266000 | -5.48507600 | 0.12455200  |
| Mg | 1.86360200  | 1.15440200  | -0.09163100 |
| C  | 1.05760300  | 4.06466700  | -0.10634600 |
| H  | 1.81929100  | -5.68258500 | -0.38765300 |
| C  | -1.04686800 | 5.22373800  | 0.17365500  |
| H  | 3.03285900  | 5.70670500  | 0.52498200  |
| N  | 2.04507600  | 3.14708000  | 0.38230200  |
| C  | 0.96209000  | -5.32045800 | 0.17435000  |
| C  | 4.09327600  | -0.74578300 | 0.64989800  |
| C  | -1.07096700 | -4.01336200 | 0.28096400  |
| C  | -4.72410600 | 1.10878300  | 0.65403300  |
| H  | -7.11314700 | -0.13813600 | 1.32206700  |
| C  | -5.12923300 | 2.43121000  | 0.85977500  |
| N  | 3.64533500  | 0.61030800  | 0.77905700  |
| H  | -1.91716100 | 5.46654700  | 0.77768300  |
| C  | -0.05908400 | 4.38726900  | 0.70041700  |
| C  | 4.17334300  | -3.01433100 | 1.48594800  |
| C  | 3.06221500  | 3.62331600  | 1.10517200  |
| H  | 6.34917200  | 0.51817100  | 1.31652600  |
| C  | 3.11296000  | 5.10013700  | 1.43232600  |
| C  | 4.41680900  | 1.47968400  | 1.43772100  |
| H  | -0.94410400 | 1.88003500  | 1.46053500  |
| C  | 3.78793400  | -1.68313600 | 1.66498500  |
| H  | -5.61659500 | 2.69751900  | 1.79501100  |
| H  | -6.76576100 | 0.95573100  | 2.66521000  |
| C  | 4.12540300  | 2.84680000  | 1.60306500  |
| C  | -6.44842300 | 0.02664900  | 2.17696200  |
| H  | 3.93323800  | -3.74591900 | 2.25293700  |
| H  | 4.04008100  | 5.35986200  | 1.94764500  |
| C  | 0.80081200  | -5.70767300 | 1.49887200  |
| H  | -4.70084200 | -0.90240900 | 1.36370400  |
| C  | -4.97292500 | 0.08401000  | 1.75333900  |
| H  | 2.27031600  | 5.38600400  | 2.07185400  |
| C  | 5.70916900  | 1.00000700  | 2.06244200  |
| C  | -1.24643800 | -4.40205900 | 1.63126400  |
| H  | -3.10838800 | -3.37972500 | 1.81506300  |

|   |             |             |            |
|---|-------------|-------------|------------|
| H | -2.22526100 | 3.03125400  | 1.84698900 |
| H | 4.85961000  | 3.39988300  | 2.17716400 |
| H | 1.07229400  | -1.27472300 | 1.97901800 |
| C | -1.22883600 | 2.68650200  | 2.14527500 |
| H | 1.52430300  | -6.36915700 | 1.96942400 |
| C | -0.21162700 | 3.83500500  | 2.11051800 |
| H | 6.26085800  | 1.82678100  | 2.51491400 |
| H | -6.60776300 | -0.78952900 | 2.89197300 |
| H | 0.75608300  | 3.42116200  | 2.41388700 |
| C | -0.29688900 | -5.24562300 | 2.21587000 |
| H | 1.47316500  | -2.78851200 | 2.79210800 |
| H | 5.51433900  | 0.24877700  | 2.83558600 |
| C | -2.42331800 | -3.92528100 | 2.47211100 |
| C | 1.56938800  | -1.69897200 | 2.85842700 |
| H | -1.46125800 | -2.07673500 | 3.13779100 |
| C | 3.04326200  | -1.27621700 | 2.92850000 |
| H | 3.06608600  | -0.18289500 | 2.99160200 |
| H | -3.52926700 | -5.81617800 | 2.34695600 |
| H | -1.30165700 | 2.26803300  | 3.15699500 |
| H | -1.59562700 | 5.30756000  | 2.96534600 |
| C | -4.08426800 | 0.35390100  | 2.97613100 |
| H | -4.29735900 | 1.33816600  | 3.41045100 |
| C | -0.58703100 | 4.91350400  | 3.13625200 |
| H | 0.10819700  | 5.76040400  | 3.10962800 |
| H | -3.02225700 | 0.33248800  | 2.71111200 |
| C | -1.96287000 | -2.95066600 | 3.56596100 |
| H | -0.42296800 | -5.54890000 | 3.25279700 |
| C | -3.20640300 | -5.08845700 | 3.09927000 |
| H | 1.02962200  | -1.36302200 | 3.75270500 |
| H | -2.81791800 | -2.59807300 | 4.15538100 |
| H | -4.09961900 | -4.71221400 | 3.61245200 |
| H | 3.61654800  | -2.91183700 | 4.27324100 |
| H | -4.25675100 | -0.39988100 | 3.75389500 |
| H | 4.75806200  | -1.56004300 | 4.26534200 |
| C | 3.69495000  | -1.82035800 | 4.20724800 |
| H | -1.25794100 | -3.43341500 | 4.25360200 |
| H | -0.57027300 | 4.49244200  | 4.14864300 |
| H | -2.60550700 | -5.62768200 | 3.84117600 |
| H | 3.19515600  | -1.40507500 | 5.09058100 |

<sup>con</sup>TS<sub>II-V</sub>

$H = -3253.592209 \text{ au}$

$G = -3253.795779 \text{ au}$

$GD3BJ = -0.4148227938 \text{ au}$

|    |             |             |            |
|----|-------------|-------------|------------|
| Mg | 1.49983200  | 6.05402600  | 9.97277300 |
| N  | 1.67957900  | 7.67439000  | 8.71077900 |
| C  | 0.81897000  | 9.47214800  | 7.27030600 |
| H  | 1.27937600  | 10.26082900 | 7.87382500 |
| H  | -0.13327900 | 9.83888400  | 6.88089600 |
| H  | 1.49268700  | 9.29469400  | 6.42481500 |
| N  | -0.44640200 | 5.65053400  | 9.42540100 |
| C  | 0.63116700  | 8.20938100  | 8.08238900 |
| C  | -0.67242000 | 7.67689900  | 8.10333900 |
| H  | -1.40603100 | 8.25286100  | 7.55120300 |
| C  | -1.16911400 | 6.49579300  | 8.68736100 |
| C  | -2.62877000 | 6.19180800  | 8.42925000 |
| H  | -2.73750000 | 5.26354200  | 7.85800000 |
| H  | -3.10986100 | 6.99850700  | 7.87192600 |
| H  | -3.16981700 | 6.04268100  | 9.36917200 |
| C  | 2.97088800  | 8.27560600  | 8.56209200 |
| C  | 3.43330500  | 9.20394100  | 9.52425300 |

|    |             |             |             |   |             |             |             |
|----|-------------|-------------|-------------|---|-------------|-------------|-------------|
| C  | 4.73604200  | 9.69856500  | 9.40353800  | H | 8.80894700  | 4.44660500  | 14.84783600 |
| H  | 5.10326300  | 10.40801500 | 10.14127400 | C | 7.18275200  | 3.36615400  | 13.92893900 |
| C  | 5.56892100  | 9.30410400  | 8.36359300  | C | 6.67831100  | 2.13478700  | 14.39702400 |
| H  | 6.57810500  | 9.70188800  | 8.28915600  | H | 7.43117900  | 1.47279700  | 14.80929400 |
| C  | 5.09888200  | 8.40217800  | 7.41581400  | C | 5.35308900  | 1.68096300  | 14.56438400 |
| H  | 5.74925400  | 8.09919600  | 6.59830200  | C | 5.19079900  | 0.41176600  | 15.37349200 |
| C  | 3.80586600  | 7.87653200  | 7.49092600  | H | 4.63322100  | 0.61181900  | 16.29507300 |
| C  | 2.55819000  | 9.69648200  | 10.66922800 | H | 6.15941300  | -0.01533200 | 15.64189100 |
| H  | 1.57166100  | 9.23189900  | 10.55866000 | H | 4.61566600  | -0.33788000 | 14.82115300 |
| C  | 3.11573800  | 9.27928000  | 12.03761600 | C | 7.06259600  | 5.58954000  | 13.07382600 |
| H  | 3.18831200  | 8.19122600  | 12.12607200 | C | 7.69938700  | 5.83433700  | 11.83451200 |
| H  | 2.46003300  | 9.63929500  | 12.84035600 | C | 8.24742500  | 7.09812500  | 11.59523100 |
| H  | 4.11369300  | 9.70139700  | 12.20702600 | H | 8.73507300  | 7.29320400  | 10.64304800 |
| C  | 2.35720300  | 11.21930000 | 10.61574600 | C | 8.18024500  | 8.10869600  | 12.54590300 |
| H  | 3.30200700  | 11.75405200 | 10.77023800 | H | 8.61637800  | 9.08375000  | 12.34279000 |
| H  | 1.66420100  | 11.53885800 | 11.40340500 | C | 7.54460100  | 7.86213700  | 13.75624700 |
| H  | 1.94722400  | 11.54512900 | 9.65312700  | H | 7.48428200  | 8.65460200  | 14.49880900 |
| C  | 3.34185700  | 6.88666400  | 6.43100200  | H | 6.97677500  | 6.61693200  | 14.04308900 |
| H  | 2.27280300  | 6.70635500  | 6.58644900  | C | 7.78253700  | 4.77912300  | 10.74227400 |
| C  | 4.06096700  | 5.53858200  | 6.58031100  | H | 7.40473000  | 3.83991400  | 11.15978100 |
| H  | 5.14148000  | 5.65056900  | 6.42826700  | C | 9.22034200  | 4.52592800  | 10.26593000 |
| H  | 3.69087400  | 4.81673000  | 5.84168200  | H | 9.64675000  | 5.41021100  | 9.77795900  |
| H  | 3.90999800  | 5.11165400  | 7.57663900  | H | 9.24036500  | 3.70752600  | 9.53585800  |
| C  | 3.51524000  | 7.42921400  | 5.00490500  | H | 9.88312700  | 4.25415700  | 11.09488700 |
| H  | 3.02128300  | 8.39863800  | 4.87472200  | C | 6.88959200  | 5.16479200  | 9.55305300  |
| H  | 3.08506800  | 6.73016100  | 4.27752700  | H | 5.85132200  | 5.33098300  | 9.86086900  |
| H  | 4.57271600  | 7.56051000  | 4.74674700  | H | 6.90712800  | 4.38478800  | 8.78066500  |
| C  | -1.05628600 | 4.45023600  | 9.91489200  | H | 7.23304700  | 6.09609800  | 9.08845400  |
| C  | -1.60178400 | 4.41784500  | 11.21996300 | C | 6.27761100  | 6.42200200  | 15.38050800 |
| C  | -2.10382300 | 3.20581400  | 11.70484900 | H | 5.93252800  | 5.38390200  | 15.42941400 |
| H  | -2.52012800 | 3.16899600  | 12.70882000 | C | 5.04287400  | 7.32850000  | 15.49242600 |
| C  | -2.08315300 | 2.05089000  | 10.93249500 | H | 5.32301800  | 8.38745600  | 15.43591600 |
| H  | -2.47951600 | 1.11938400  | 11.32935400 | H | 4.53714500  | 7.17064100  | 16.45261100 |
| C  | -1.55914800 | 2.09813000  | 9.64563800  | H | 4.32579200  | 7.12374700  | 14.69130200 |
| H  | -1.55099900 | 1.19528800  | 9.03904700  | C | 7.22615500  | 6.64862500  | 16.56718400 |
| C  | -1.04464100 | 3.28372500  | 9.11298500  | H | 7.58192200  | 7.68529400  | 16.60712300 |
| C  | -1.68146900 | 5.65741300  | 12.10063900 | H | 8.10675100  | 5.99850800  | 16.51425600 |
| H  | -1.28392200 | 6.50080000  | 11.52471000 | H | 6.71026700  | 6.44058600  | 17.51239700 |
| C  | -0.82560900 | 5.51809600  | 13.36763900 | C | 2.97315100  | 1.82194700  | 14.48664400 |
| H  | -1.16081900 | 4.67667700  | 13.98597800 | C | 2.30242800  | 0.84976900  | 13.70795500 |
| H  | -0.89657800 | 6.42877700  | 13.97546100 | C | 1.02465100  | 0.43730100  | 14.09777400 |
| H  | 0.22880000  | 5.35923200  | 13.12282500 | H | 0.50257100  | -0.30740900 | 13.50155500 |
| C  | -3.13383000 | 5.99751600  | 12.47080900 | C | 0.40764800  | 0.96080600  | 15.22696600 |
| H  | -3.76657900 | 6.11509800  | 11.58382100 | H | -0.58513300 | 0.62450400  | 15.51591400 |
| H  | -3.17181700 | 6.93495000  | 13.03878800 | C | 1.07005900  | 1.92219600  | 15.97979700 |
| H  | -3.58198700 | 5.21484500  | 13.09463700 | H | 0.58478600  | 2.33788900  | 16.85995800 |
| C  | -0.47952600 | 3.28028700  | 7.69884400  | C | 2.34778400  | 2.37061700  | 15.63120600 |
| H  | -0.26724000 | 4.31808500  | 7.42051500  | C | 2.91131300  | 0.26180900  | 12.44421000 |
| C  | 0.84511300  | 2.50734200  | 7.63378600  | H | 3.94403200  | 0.61992800  | 12.37679600 |
| H  | 0.69852000  | 1.45370900  | 7.90141100  | C | 2.15549300  | 0.75801900  | 11.20218600 |
| H  | 1.58683700  | 2.92322300  | 8.32251400  | H | 1.11407200  | 0.41655800  | 11.21059500 |
| H  | 1.26560800  | 2.54128500  | 6.62102800  | H | 2.62008200  | 0.37747700  | 10.28303400 |
| C  | -1.47366200 | 2.72230700  | 6.66990400  | H | 2.12656100  | 1.85231300  | 11.15419700 |
| H  | -1.67457800 | 1.65711700  | 6.83521100  | C | 2.95698000  | -1.27299700 | 12.46116400 |
| H  | -1.06786100 | 2.82514100  | 5.65620200  | H | 3.49085000  | -1.65585300 | 13.33803000 |
| H  | -2.43441000 | 3.24819400  | 6.70393400  | H | 3.46790200  | -1.64799800 | 11.56586700 |
| Mg | 4.49656300  | 3.91348700  | 12.83159500 | H | 1.95109900  | -1.70878500 | 12.47053300 |
| N  | 6.45399300  | 4.31770900  | 13.34013700 | C | 3.00888500  | 3.43933400  | 16.48926100 |
| N  | 4.26776500  | 2.30090500  | 14.09543600 | H | 4.00401200  | 3.63228300  | 16.07479500 |
| C  | 8.65921700  | 3.60264400  | 14.16557500 | C | 3.19712800  | 2.97831800  | 17.94228300 |
| H  | 9.17189800  | 3.86369700  | 13.23450300 | H | 2.23481800  | 2.79415700  | 18.43483900 |
| H  | 9.13898000  | 2.72126700  | 14.59644400 | H | 3.72264500  | 3.74741100  | 18.52128700 |

|   |            |            |             |
|---|------------|------------|-------------|
| H | 3.78221900 | 2.05362200 | 18.00277100 |
| C | 2.22021600 | 4.75609100 | 16.43375300 |
| H | 2.14329100 | 5.12917300 | 15.40764600 |
| H | 2.71456700 | 5.52389400 | 17.04083000 |
| H | 1.20414700 | 4.62729600 | 16.82647400 |
| O | 2.98857200 | 4.74170100 | 10.66230700 |
| C | 2.60152900 | 5.50747000 | 11.66132200 |
| O | 3.15874900 | 5.33621100 | 12.79755600 |
| C | 4.62647900 | 2.67360800 | 9.90610900  |
| O | 5.02534600 | 2.64781500 | 11.01254500 |
| O | 4.29794300 | 2.62136000 | 8.79611400  |

**V**

$H = -3253.601414 \text{ au}$

$G = -3253.804995 \text{ au}$

$GD3BJ = -0.4090577179 \text{ au}$

|    |             |             |             |
|----|-------------|-------------|-------------|
| Mg | -1.67488200 | 1.14658700  | -1.54498700 |
| N  | -1.62528500 | 2.98027300  | -2.42778000 |
| C  | -2.56597700 | 4.85666500  | -3.70521500 |
| H  | -2.30975700 | 5.59760000  | -2.94110700 |
| H  | -3.50307800 | 5.15287100  | -4.18126000 |
| H  | -1.76819700 | 4.89477700  | -4.45456700 |
| N  | -3.55169500 | 0.66346800  | -2.17691400 |
| C  | -2.66503600 | 3.47253000  | -3.10559000 |
| C  | -3.88092300 | 2.79128000  | -3.30731200 |
| H  | -4.61997100 | 3.34447900  | -3.87501200 |
| C  | -4.30257900 | 1.51843200  | -2.87778300 |
| C  | -5.71760500 | 1.12841000  | -3.23976600 |
| H  | -5.73095800 | 0.21459600  | -3.84167900 |
| H  | -6.21823900 | 1.92141700  | -3.79922500 |
| H  | -6.30112100 | 0.91480100  | -2.33747900 |
| C  | -0.45481700 | 3.78468800  | -2.22693700 |
| C  | -0.35030300 | 4.57193800  | -1.05487700 |
| C  | 0.83972500  | 5.26717000  | -0.82086900 |
| H  | 0.93303300  | 5.87307300  | 0.07747500  |
| C  | 1.90428600  | 5.19849100  | -1.71169800 |
| H  | 2.82335700  | 5.74300000  | -1.50999300 |
| C  | 1.78417500  | 4.43243500  | -2.86491500 |
| H  | 2.61720000  | 4.38371000  | -3.56209900 |
| C  | 0.61524000  | 3.71928200  | -3.14954000 |
| C  | -1.48838000 | 4.68935400  | -0.04945700 |
| H  | -2.34019000 | 4.12224500  | -0.44134900 |
| C  | -1.11202100 | 4.08021400  | 1.30914700  |
| H  | -0.81764000 | 3.03014300  | 1.21312800  |
| H  | -1.96085500 | 4.13406900  | 2.00219800  |
| H  | -0.27418900 | 4.61939600  | 1.76705400  |
| C  | -1.95165300 | 6.14348800  | 0.12758600  |
| H  | -1.16311800 | 6.76589100  | 0.56700500  |
| H  | -2.81893400 | 6.18813800  | 0.79742600  |
| H  | -2.23905100 | 6.59915300  | -0.82649100 |
| C  | 0.53472500  | 2.91074500  | -4.43746400 |
| H  | -0.47914000 | 2.50144900  | -4.51343500 |
| C  | 1.51410700  | 1.72773600  | -4.43452400 |
| H  | 2.54987900  | 2.07240900  | -4.32883700 |
| H  | 1.44199600  | 1.17183800  | -5.37713000 |
| H  | 1.31201400  | 1.02151300  | -3.62403700 |
| C  | 0.77163500  | 3.78807100  | -5.67720100 |
| H  | 0.09720800  | 4.65141100  | -5.70648300 |
| H  | 0.61295400  | 3.20303500  | -6.59095400 |
| H  | 1.79834400  | 4.17194800  | -5.70743000 |
| C  | -4.09054500 | -0.61088800 | -1.79600600 |

|    |             |             |             |
|----|-------------|-------------|-------------|
| C  | -4.66146800 | -0.76402000 | -0.51044600 |
| C  | -5.07588300 | -2.03745300 | -0.10871000 |
| H  | -5.50653100 | -2.16839800 | 0.88107300  |
| C  | -4.94725000 | -3.13708300 | -0.94813900 |
| H  | -5.27228600 | -4.12021200 | -0.61689100 |
| C  | -4.40612500 | -2.96966500 | -2.21727600 |
| H  | -4.31427200 | -3.83041800 | -2.87538000 |
| C  | -3.97465600 | -1.71861500 | -2.66942700 |
| C  | -4.84860700 | 0.41058300  | 0.44019200  |
| H  | -4.54900100 | 1.32165600  | -0.09067200 |
| C  | -3.95733300 | 0.28214100  | 1.68375600  |
| H  | -4.19810000 | -0.62113300 | 2.25601500  |
| H  | -4.09316500 | 1.14671500  | 2.34523100  |
| H  | -2.89659100 | 0.22498000  | 1.41750100  |
| C  | -6.31875000 | 0.58852200  | 0.84926000  |
| H  | -6.97352900 | 0.68859900  | -0.02370200 |
| H  | -6.43600400 | 1.48830800  | 1.46527200  |
| H  | -6.67979300 | -0.26312900 | 1.43780400  |
| C  | -3.40962600 | -1.59814000 | -4.07905900 |
| H  | -3.21670800 | -0.53748800 | -4.27554300 |
| C  | -2.07711200 | -2.34658500 | -4.22836800 |
| H  | -2.20094300 | -3.41690300 | -4.02255500 |
| H  | -1.30465800 | -1.96391600 | -3.55558300 |
| H  | -1.69849700 | -2.24783500 | -5.25317900 |
| C  | -4.40816800 | -2.09059700 | -5.13923000 |
| H  | -4.58440700 | -3.16937400 | -5.05349700 |
| H  | -4.01450400 | -1.90167500 | -6.14503600 |
| H  | -5.38044100 | -1.59155600 | -5.05771800 |
| Mg | 1.70965400  | -1.33360100 | 1.28066600  |
| N  | 3.67618500  | -0.96825700 | 1.76874400  |
| N  | 1.33387700  | -2.56095900 | 2.88117200  |
| C  | 5.72250700  | -1.30970100 | 3.11466000  |
| H  | 6.27990000  | -0.89870400 | 2.27115400  |
| H  | 6.23073600  | -2.20732900 | 3.47831900  |
| H  | 5.75349900  | -0.56751600 | 3.92228500  |
| C  | 4.28140700  | -1.61715600 | 2.76217500  |
| C  | 3.66209500  | -2.58139900 | 3.58483400  |
| H  | 4.32320500  | -3.03703700 | 4.31446500  |
| C  | 2.31952200  | -2.99014700 | 3.67623800  |
| C  | 2.00738300  | -3.96094000 | 4.79567600  |
| H  | 1.54620000  | -3.43685200 | 5.64087500  |
| H  | 2.91756600  | -4.44501900 | 5.15777000  |
| H  | 1.29805300  | -4.72896500 | 4.47626100  |
| C  | 4.39037600  | 0.01167000  | 1.00589200  |
| C  | 4.99130300  | -0.36052500 | -0.22228400 |
| C  | 5.62081500  | 0.63097800  | -0.98158300 |
| H  | 6.09342000  | 0.35761100  | -1.92139200 |
| C  | 5.65632500  | 1.95572500  | -0.56180500 |
| H  | 6.14850400  | 2.70993200  | -1.17108800 |
| C  | 5.06096100  | 2.30776500  | 0.64314800  |
| H  | 5.08969000  | 3.34454900  | 0.97056300  |
| C  | 4.42700000  | 1.35536400  | 1.44692200  |
| C  | 5.01839800  | -1.80454500 | -0.70786800 |
| H  | 4.27490100  | -2.36326100 | -0.12968800 |
| C  | 6.39014700  | -2.44836200 | -0.44460900 |
| H  | 7.18115300  | -1.91741500 | -0.98897600 |
| H  | 6.39267400  | -3.49217100 | -0.78174500 |
| H  | 6.65229900  | -2.43872700 | 0.61809300  |
| C  | 4.64983600  | -1.95091700 | -2.18975600 |
| H  | 3.67840700  | -1.50547700 | -2.41862200 |
| H  | 4.59519100  | -3.01378600 | -2.45319600 |
| H  | 5.40206200  | -1.49420500 | -2.84474700 |



|   |             |             |             |
|---|-------------|-------------|-------------|
| C | 3.79929000  | 1.79724000  | 2.76178200  |
| H | 3.43679400  | 0.90201000  | 3.27855600  |
| C | 2.58967500  | 2.71295900  | 2.52568700  |
| H | 2.88412000  | 3.62976500  | 2.00090100  |
| H | 2.13516700  | 3.00351400  | 3.48112300  |
| H | 1.82297100  | 2.21648500  | 1.92336100  |
| C | 4.81817200  | 2.48150100  | 3.68544300  |
| H | 5.17160000  | 3.43004500  | 3.26371800  |
| H | 5.69654500  | 1.85005000  | 3.85788300  |
| H | 4.36178900  | 2.70449700  | 4.65762100  |
| C | -0.01291500 | -2.95958800 | 3.15989700  |
| C | -0.60056700 | -4.01417800 | 2.42132900  |
| C | -1.93358100 | -4.35155800 | 2.67821000  |
| H | -2.38975700 | -5.16697100 | 2.12195900  |
| C | -2.68362500 | -3.66910700 | 3.62798700  |
| H | -3.71772200 | -3.94887800 | 3.81463300  |
| C | -2.10035400 | -2.62647000 | 4.33908700  |
| H | -2.69081800 | -2.08991700 | 5.07818500  |
| C | -0.76994100 | -2.25351900 | 4.12733800  |
| C | 0.17562600  | -4.80646800 | 1.37834600  |
| H | 1.15189200  | -4.32570900 | 1.25291200  |
| C | -0.52237400 | -4.80070200 | 0.01169000  |
| H | -1.47767500 | -5.33840000 | 0.04316400  |
| H | 0.10948000  | -5.28967100 | -0.73893300 |
| H | -0.72271700 | -3.78152600 | -0.33092400 |
| C | 0.43343600  | -6.24909000 | 1.84094100  |
| H | 0.98790000  | -6.28005700 | 2.78504300  |
| H | 1.01877900  | -6.79293700 | 1.08952300  |
| H | -0.50786300 | -6.79244900 | 1.98965700  |
| C | -0.19136100 | -1.09200400 | 4.92545300  |
| H | 0.88621300  | -1.05581900 | 4.73376100  |
| C | -0.38608500 | -1.26228200 | 6.43941100  |
| H | -1.44398900 | -1.20220600 | 6.72196100  |
| H | 0.14067100  | -0.46699600 | 6.98049800  |
| H | -0.00488000 | -2.22529500 | 6.79695600  |
| C | -0.78310100 | 0.24826900  | 4.46232800  |
| H | -0.59981400 | 0.42044100  | 3.39757000  |
| H | -0.33855800 | 1.07900600  | 5.02491100  |
| H | -1.86733600 | 0.27523900  | 4.62658400  |
| O | -0.11834800 | -0.27738300 | -1.22015900 |
| C | -0.35009300 | 0.39232800  | -0.01155200 |
| O | 0.34081300  | 0.13914900  | 0.98086200  |
| C | 0.91258400  | -1.33976100 | -1.57955800 |
| O | 1.44571300  | -1.88560800 | -0.58405400 |
| O | 1.01992300  | -1.47756000 | -2.76985400 |

<sup>con</sup>TS<sub>v-IV</sub>

$H = -3253.595312 \text{ au}$

$G = -3253.798443 \text{ au}$

$GD3BJ = -0.4105217254 \text{ au}$

|    |             |             |            |
|----|-------------|-------------|------------|
| Mg | 1.37398900  | 5.85711200  | 9.89473800 |
| N  | 1.52943400  | 7.71666700  | 9.06180200 |
| C  | 0.70546700  | 9.57908200  | 7.65704900 |
| H  | 1.43589700  | 10.20709600 | 8.17010700 |
| H  | -0.25430700 | 10.10202100 | 7.62055200 |
| H  | 1.04714700  | 9.45075300  | 6.62261300 |
| N  | -0.50652700 | 5.46050400  | 9.23050700 |
| C  | 0.54988400  | 8.22170900  | 8.31007400 |
| C  | -0.67114900 | 7.57130000  | 8.03704300 |
| H  | -1.34641200 | 8.13921300  | 7.40627400 |
| C  | -1.17355600 | 6.32909600  | 8.46261200 |

|   |             |             |             |
|---|-------------|-------------|-------------|
| C | -2.57447100 | 5.98670600  | 8.00796700  |
| H | -2.56742800 | 5.10509500  | 7.35888600  |
| H | -3.02801900 | 6.81533100  | 7.45994300  |
| H | -3.21278300 | 5.73902200  | 8.86220400  |
| C | 2.69479300  | 8.49967000  | 9.35923600  |
| C | 2.73269200  | 9.23295300  | 10.57155200 |
| C | 3.89820100  | 9.93561100  | 10.89050900 |
| H | 3.93669500  | 10.50970400 | 11.81268600 |
| C | 5.00732300  | 9.91627200  | 10.05291000 |
| H | 5.90697400  | 10.46379800 | 10.32234500 |
| C | 4.95543700  | 9.19670900  | 8.86613900  |
| H | 5.82194400  | 9.18751000  | 8.20953900  |
| C | 3.81097600  | 8.48498600  | 8.49068300  |
| C | 1.52861200  | 9.32633600  | 11.50055600 |
| H | 0.81789100  | 8.54600300  | 11.20527300 |
| C | 1.88468700  | 9.08671700  | 12.97308300 |
| H | 2.39940600  | 8.13142800  | 13.10851000 |
| H | 0.97188800  | 9.07069400  | 13.58089000 |
| H | 2.52631900  | 9.88047100  | 13.37367400 |
| C | 0.81439800  | 10.67841500 | 11.33976400 |
| H | 1.48008900  | 11.50582100 | 11.61487100 |
| H | -0.06894900 | 10.72728400 | 11.98858100 |
| H | 0.48493100  | 10.84474400 | 10.30907200 |
| C | 3.80916000  | 7.75474200  | 7.15430700  |
| H | 2.82909000  | 7.28064500  | 7.02971500  |
| C | 4.86936400  | 6.64519500  | 7.09984000  |
| H | 5.87862000  | 7.05365200  | 7.23222800  |
| H | 4.83973700  | 6.14368900  | 6.12453900  |
| H | 4.70229900  | 5.88527000  | 7.86747000  |
| C | 4.00898400  | 8.73137900  | 5.98359100  |
| H | 3.28223300  | 9.55054700  | 6.00180200  |
| H | 3.90682200  | 8.20425400  | 5.02732300  |
| H | 5.00987000  | 9.17909700  | 6.00701000  |
| C | -1.13428500 | 4.23323100  | 9.62761200  |
| C | -1.78287400 | 4.16403900  | 10.88367600 |
| C | -2.30705100 | 2.93747500  | 11.30242900 |
| H | -2.80515700 | 2.87504900  | 12.26729100 |
| C | -2.20508100 | 1.79995600  | 10.51127100 |
| H | -2.61725600 | 0.85418600  | 10.85447500 |
| C | -1.57678900 | 1.88260400  | 9.27450500  |
| H | -1.50225600 | 0.99246000  | 8.65419200  |
| C | -1.03695000 | 3.08474700  | 8.80613900  |
| C | -1.94297500 | 5.38052100  | 11.78607600 |
| H | -1.50107600 | 6.24104300  | 11.27116800 |
| C | -1.20067300 | 5.20482100  | 13.11895000 |
| H | -1.59350800 | 4.35313600  | 13.68638200 |
| H | -1.31197700 | 6.10207900  | 13.74014000 |
| H | -0.13034600 | 5.03200400  | 12.96617100 |
| C | -3.42184700 | 5.71155600  | 12.03902900 |
| H | -3.97002100 | 5.86482100  | 11.10289600 |
| H | -3.51127900 | 6.62699900  | 12.63651000 |
| H | -3.92387900 | 4.90654000  | 12.58874500 |
| C | -0.37390500 | 3.10710200  | 7.43457500  |
| H | -0.09235200 | 4.14259800  | 7.21315500  |
| C | 0.90959900  | 2.26355900  | 7.40757200  |
| H | 0.69728600  | 1.21552500  | 7.65192800  |
| H | 1.65753700  | 2.63520600  | 8.11316100  |
| H | 1.35884100  | 2.28855600  | 6.40709200  |
| C | -1.33178600 | 2.63832300  | 6.32726400  |
| H | -1.58660700 | 1.57787900  | 6.44037300  |
| H | -0.86190800 | 2.75980000  | 5.34399800  |
| H | -2.27129700 | 3.20238500  | 6.32484300  |

|    |             |             |             |
|----|-------------|-------------|-------------|
| Mg | 4.80309900  | 3.76004800  | 12.78936000 |
| N  | 6.78894000  | 4.04813000  | 13.22076400 |
| N  | 4.43330400  | 2.48076800  | 14.34894600 |
| C  | 8.87955100  | 3.53946200  | 14.42833200 |
| H  | 9.43520800  | 3.81866200  | 13.53068100 |
| H  | 9.33404300  | 2.64907700  | 14.87021800 |
| H  | 8.99453500  | 4.36193200  | 15.14515900 |
| C  | 7.41044200  | 3.31217600  | 14.14287600 |
| C  | 6.78863800  | 2.32671900  | 14.93669900 |
| H  | 7.46134300  | 1.79955000  | 15.60430100 |
| C  | 5.43466500  | 1.96656900  | 15.06937400 |
| C  | 5.13568200  | 0.94475000  | 16.14582000 |
| H  | 4.77295500  | 1.44091000  | 17.05349000 |
| H  | 6.03461300  | 0.38226000  | 16.40963000 |
| H  | 4.35548500  | 0.24568400  | 15.83382700 |
| C  | 7.51935000  | 5.04383200  | 12.49210200 |
| C  | 8.07464400  | 4.72204000  | 11.22919700 |
| C  | 8.72594300  | 5.73055400  | 10.51178300 |
| H  | 9.16353400  | 5.49318700  | 9.54506000  |
| C  | 8.82790400  | 7.02520800  | 11.00657500 |
| H  | 9.33668400  | 7.79371700  | 10.42966900 |
| C  | 8.27792600  | 7.32826100  | 12.24597800 |
| H  | 8.35948700  | 8.34145100  | 12.63308600 |
| C  | 7.62390200  | 6.35676900  | 13.00972800 |
| C  | 8.02777100  | 3.31411200  | 10.64858700 |
| H  | 7.37907500  | 2.70958700  | 11.29141100 |
| C  | 9.42175400  | 2.66454800  | 10.65523500 |
| H  | 10.12000000 | 3.22399000  | 10.02050100 |
| H  | 9.36658300  | 1.63976500  | 10.26794700 |
| H  | 9.85077500  | 2.61992800  | 11.66187500 |
| C  | 7.43626100  | 3.27786200  | 9.23302200  |
| H  | 6.42327400  | 3.68655500  | 9.20946500  |
| H  | 7.38610100  | 2.24135500  | 8.87750600  |
| H  | 8.05509900  | 3.83756300  | 8.52115000  |
| C  | 7.04665400  | 6.74932800  | 14.36309300 |
| H  | 6.65100200  | 5.84338600  | 14.83511600 |
| C  | 5.88075800  | 7.73725700  | 14.21082200 |
| H  | 6.21367100  | 8.67144000  | 13.74279600 |
| H  | 5.45766700  | 7.98607000  | 15.19208400 |
| H  | 5.08044500  | 7.32259400  | 13.59105300 |
| C  | 8.11590700  | 7.33065400  | 15.30042000 |
| H  | 8.50192900  | 8.28642300  | 14.92631600 |
| H  | 8.96963400  | 6.65381700  | 15.41435000 |
| H  | 7.69207200  | 7.51449400  | 16.29520300 |
| C  | 3.08412400  | 2.11036000  | 14.65628800 |
| C  | 2.43451700  | 1.12343200  | 13.87640100 |
| C  | 1.10152500  | 0.81165200  | 14.16309700 |
| H  | 0.59777700  | 0.04828900  | 13.57524400 |
| C  | 0.40925300  | 1.45717600  | 15.18024800 |
| H  | -0.62677300 | 1.20022700  | 15.38719300 |
| C  | 1.05237900  | 2.43436600  | 15.93070200 |
| H  | 0.50712000  | 2.94266100  | 16.72266900 |
| C  | 2.38671900  | 2.77749300  | 15.69319800 |
| C  | 3.14618300  | 0.37441000  | 12.75791300 |
| H  | 4.11729000  | 0.85598500  | 12.59877300 |
| C  | 2.37569700  | 0.44078700  | 11.43261600 |
| H  | 1.43104100  | -0.11353300 | 11.48413600 |
| H  | 2.97302100  | 0.00071100  | 10.62553200 |
| H  | 2.14032200  | 1.47268600  | 11.15753900 |
| C  | 3.42095500  | -1.08790700 | 13.14256400 |
| H  | 4.03453900  | -1.16301900 | 14.04665600 |
| H  | 3.95188200  | -1.60311600 | 12.33272400 |

|   |            |             |             |
|---|------------|-------------|-------------|
| H | 2.48525400 | -1.62956900 | 13.32807600 |
| C | 3.03008200 | 3.86277600  | 16.54732500 |
| H | 4.09520600 | 3.90391700  | 16.29570100 |
| C | 2.91878400 | 3.56621700  | 18.05077300 |
| H | 1.87800300 | 3.60364300  | 18.39365300 |
| H | 3.47985500 | 4.31168000  | 18.62712300 |
| H | 3.31227300 | 2.57568400  | 18.30426200 |
| C | 2.43238100 | 5.24424900  | 16.23840200 |
| H | 2.55808700 | 5.50997000  | 15.18494200 |
| H | 2.92016700 | 6.01746600  | 16.84519800 |
| H | 1.35955100 | 5.26858800  | 16.46584400 |
| O | 2.40610000 | 4.43807500  | 10.85528700 |
| C | 2.54498800 | 5.54793100  | 11.93843600 |
| O | 3.45554700 | 5.35554100  | 12.71742200 |
| C | 3.54908700 | 3.92582200  | 10.16540600 |
| O | 4.42659600 | 3.39051700  | 10.89896800 |
| O | 3.51103300 | 4.11661000  | 8.95625300  |

${}^{\text{oxa}}\text{TS}_{\text{II-VI}}$

$H = -3253.581008 \text{ au}$

$G = -3253.786773 \text{ au}$

$GD3BJ = -0.407247554 \text{ au}$

|   |             |             |             |
|---|-------------|-------------|-------------|
| H | -2.61150700 | 0.54672000  | -6.03858200 |
| H | -2.56333300 | -1.20773800 | -6.25911800 |
| H | 2.07536900  | -5.08815100 | -3.97367500 |
| H | 3.19784600  | -3.04444500 | -4.79173900 |
| C | -2.93162200 | -0.40856400 | -5.60485700 |
| H | -4.02635000 | -0.43889900 | -5.63069900 |
| H | 5.61212500  | -2.05584700 | -4.76888400 |
| C | 2.46758700  | -4.36184000 | -3.26615500 |
| C | 3.09625400  | -3.20906800 | -3.72158900 |
| H | -0.42499800 | -1.31362400 | -4.75983700 |
| H | -0.50979000 | 0.45244500  | -4.62178600 |
| H | 3.37718000  | -0.89346200 | -5.37221500 |
| C | 5.68086700  | -1.33647800 | -3.94367100 |
| H | 6.16264300  | -0.42866500 | -4.32780900 |
| H | -2.02660100 | -3.08456600 | -5.01739300 |
| H | 6.33751900  | -1.76608600 | -3.18059000 |
| C | -0.85476600 | -0.48954100 | -4.17820300 |
| C | -2.38924300 | -0.55342400 | -4.17566200 |
| H | 1.84536400  | -5.47785500 | -1.54563500 |
| H | -5.42832400 | -0.70284800 | -3.87563000 |
| C | 2.34258100  | -4.57800000 | -1.89946800 |
| H | -2.75728000 | 0.29901900  | -3.59382800 |
| C | 3.44598900  | -0.30289100 | -4.45113400 |
| C | -2.56778000 | -3.06011100 | -4.07412200 |
| H | -6.80949200 | 0.11135400  | -3.10598900 |
| H | 3.90093800  | 0.65941600  | -4.71638000 |
| C | 3.60005600  | -2.25585100 | -2.83129200 |
| C | 4.28739300  | -1.01300000 | -3.38131500 |
| H | -0.46218900 | -0.56682400 | -3.15806900 |
| C | -2.86559700 | -1.82517300 | -3.48996500 |
| C | -5.94989600 | -0.53859600 | -2.92805300 |
| H | -2.70159900 | -5.20546100 | -3.94218300 |
| H | 2.42376800  | -0.11967500 | -4.10451100 |
| C | -2.94159100 | -4.25492300 | -3.47193300 |
| H | -6.31948400 | -1.51839900 | -2.60488900 |
| C | 2.84321800  | -3.66580800 | -0.96489400 |
| H | 4.42467500  | -0.31625000 | -2.54697400 |
| H | -0.52230900 | 4.53456700  | -0.77105700 |
| C | 3.47655600  | -2.49315700 | -1.44055900 |

|    |             |             |             |
|----|-------------|-------------|-------------|
| H  | -2.57659400 | 6.02881100  | -0.79305600 |
| H  | -6.44510000 | 1.57498200  | -1.59906400 |
| H  | 0.61427100  | -4.65124400 | 0.40836500  |
| C  | -5.02417800 | 0.04932400  | -1.88418900 |
| C  | -3.57228500 | -1.80286300 | -2.26506100 |
| H  | 3.94616400  | 4.38186000  | -1.97634400 |
| H  | 2.75265800  | -6.15998900 | 0.43417800  |
| H  | 7.09038400  | -2.53403200 | -0.14687000 |
| C  | -3.61640400 | -4.22321900 | -2.25767900 |
| N  | -3.86355900 | -0.55599900 | -1.62116700 |
| C  | -5.49480900 | 1.20548500  | -1.23121200 |
| O  | 0.27844900  | 2.37516700  | -2.60664000 |
| H  | 0.77555800  | -2.93110200 | 0.80766600  |
| H  | -2.79832800 | 3.60415900  | -0.47459900 |
| C  | -3.94236200 | -3.01478900 | -1.63470600 |
| C  | 1.21694800  | -3.92024700 | 0.96118700  |
| H  | 2.46095400  | 4.16136900  | -1.02184100 |
| H  | -3.89718900 | -5.15836300 | -1.77861600 |
| H  | 5.91757800  | -3.07924700 | -1.37131000 |
| C  | -0.83384000 | 4.12241200  | 0.19669400  |
| C  | -2.85153500 | 5.63521600  | 0.19313900  |
| C  | 3.51844900  | 4.44158100  | -0.96813500 |
| C  | 2.68752800  | -3.97210600 | 0.51894000  |
| O  | 2.08317200  | 1.28974900  | -1.60417400 |
| H  | -6.66225400 | -3.36551600 | -1.14114300 |
| H  | -0.48119800 | 3.08765400  | 0.26902300  |
| H  | -3.93986700 | 5.71101000  | 0.29435900  |
| C  | 3.30659800  | -5.32977300 | 0.88826500  |
| C  | 6.03883900  | -2.76725900 | -0.33159300 |
| H  | 3.55760800  | 5.49423300  | -0.66430800 |
| H  | 6.21266200  | 4.17136500  | -0.83885200 |
| C  | 1.14787800  | 1.81568700  | -2.08349100 |
| H  | 4.34888400  | -5.41120600 | 0.55939400  |
| N  | 3.93252000  | -1.49657900 | -0.51587900 |
| C  | -2.36136400 | 4.18794600  | 0.34318500  |
| H  | -6.17338300 | 2.75843900  | 1.47967600  |
| H  | -0.33421700 | 4.69565800  | 0.98626800  |
| H  | -2.40352300 | 6.29442700  | 0.94610300  |
| C  | -4.99380900 | 1.89491100  | -0.10901100 |
| Mg | -2.53276500 | 0.20047800  | -0.23739000 |
| H  | -6.79153900 | 3.10055900  | -0.14950200 |
| H  | 1.13554600  | -4.16188300 | 2.02850400  |
| H  | 5.77300400  | -3.62938000 | 0.29221500  |
| H  | 4.36470700  | 2.54219500  | -0.45316300 |
| C  | -5.88436500 | 2.98522600  | 0.44765500  |
| H  | 3.22853800  | -3.20177400 | 1.08026900  |
| H  | 3.27967200  | -5.47489900 | 1.97485800  |
| C  | 5.15232200  | -1.59110600 | 0.01751700  |
| H  | -4.88078200 | -2.01579500 | -0.00459900 |
| C  | -6.00504500 | -3.79304000 | -0.37537600 |
| C  | -4.66362600 | -3.04956600 | -0.29467400 |
| H  | -5.86508300 | -4.85430700 | -0.61376300 |
| C  | 4.30129200  | 3.53926300  | -0.00349200 |
| N  | -3.82886600 | 1.63285200  | 0.48624500  |
| C  | 5.73802600  | 4.06556400  | 0.14463600  |
| Mg | 2.60313400  | -0.07335900 | 0.10746700  |
| H  | 5.74497500  | 5.04954400  | 0.62945800  |
| C  | -0.48497100 | -0.18336200 | 0.19068900  |
| H  | -6.52838100 | -3.73845200 | 0.58693900  |
| O  | -1.30954200 | -0.88256500 | 0.89524800  |
| C  | -2.79476900 | 3.54889500  | 1.65409600  |
| H  | 6.35877000  | 3.39245400  | 0.74365600  |

|   |             |             |            |
|---|-------------|-------------|------------|
| H | -5.35959300 | 3.94543400  | 0.47798000 |
| O | 0.77541500  | -0.34598800 | 0.41665700 |
| C | 5.69394600  | -0.68151100 | 0.94721000 |
| C | -3.49772500 | 2.32242300  | 1.69810800 |
| C | -3.76904100 | -3.65961600 | 0.79555300 |
| H | -2.83321900 | -3.10200100 | 0.90326000 |
| H | 6.69842100  | -0.92297400 | 1.27741700 |
| H | -3.51772100 | -4.70166500 | 0.56143500 |
| C | 3.61110800  | 3.38617400  | 1.34563300 |
| H | 3.23734800  | 5.49652100  | 1.53283100 |
| H | -1.91586500 | 5.11811600  | 2.83149600 |
| N | 3.92231900  | 0.94731800  | 1.29650000 |
| C | 5.14014400  | 0.46208000  | 1.55402800 |
| C | -2.45562900 | 4.17430600  | 2.85770200 |
| C | 3.12037500  | 4.52110300  | 1.99867500 |
| H | -4.77789900 | 0.06269100  | 2.02926600 |
| H | -4.28614600 | -3.65179100 | 1.76302100 |
| C | 3.46916900  | 2.12540600  | 1.97625300 |
| C | -3.82424300 | 1.73283200  | 2.94241600 |
| H | 7.06121800  | 0.87517100  | 2.45725700 |
| H | 5.71430700  | 0.77478800  | 3.59927400 |
| C | 6.00752600  | 1.12594900  | 2.60225400 |
| C | -4.54475900 | 0.39624100  | 3.04631300 |
| H | -6.53996600 | 1.25554100  | 3.34710500 |
| C | -2.78681700 | 3.61239900  | 4.08460000 |
| C | 2.48295900  | 4.42673500  | 3.23036500 |
| H | -2.71637200 | -0.80125300 | 3.12205800 |
| H | 0.78665600  | 0.08970500  | 2.97487700 |
| C | 2.82798400  | 2.01826900  | 3.23307700 |
| C | -3.45959100 | 2.39710200  | 4.11741900 |
| H | 2.10202100  | 5.31982100  | 3.71962500 |
| C | -5.87539900 | 0.51364100  | 3.80440500 |
| H | 5.89416200  | 2.21238000  | 2.60401000 |
| H | 3.22137900  | -0.06999200 | 3.40142500 |
| C | -3.64357100 | -0.66939600 | 3.68872200 |
| H | -6.39808500 | -0.45062400 | 3.80767300 |
| H | -2.51634500 | 4.11552400  | 5.00986100 |
| H | -4.16242900 | -1.63519300 | 3.72662700 |
| C | 2.33593700  | 3.18276100  | 3.83132200 |
| C | 2.65642800  | 0.68849500  | 3.95532000 |
| C | 1.18604900  | 0.24208600  | 3.98191600 |
| H | -3.70886000 | 1.95011400  | 5.07716200 |
| H | -5.71942700 | 0.80730100  | 4.84955000 |
| H | -3.37827200 | -0.39470500 | 4.71723700 |
| H | 1.08828200  | -0.70485400 | 4.52733400 |
| H | 1.83049200  | 3.11120100  | 4.79111900 |
| H | 0.55766400  | 0.98564200  | 4.48700400 |
| H | 4.26548500  | 1.08241400  | 5.39806700 |
| C | 3.22684600  | 0.73300800  | 5.38154400 |
| H | 3.19534000  | -0.26640100 | 5.83172800 |
| H | 2.64427400  | 1.39975600  | 6.02824400 |

## VI

$H = -3253.703826 \text{ au}$

$G = -3253.905276 \text{ au}$

$GD3BJ = -0.4018048323 \text{ au}$

|   |             |             |             |
|---|-------------|-------------|-------------|
| H | -3.55338100 | 0.53974700  | -6.10869700 |
| H | -3.20049200 | -1.18534500 | -6.29363300 |
| H | 1.99999500  | -4.73970300 | -4.19487300 |
| H | 3.05619900  | -2.57413400 | -4.74402800 |
| C | -3.59483100 | -0.43174900 | -5.60135200 |

|   |             |             |             |    |             |             |             |
|---|-------------|-------------|-------------|----|-------------|-------------|-------------|
| H | -4.64788900 | -0.67032500 | -5.41657300 | C  | 6.17271400  | -2.67415800 | -0.57760500 |
| H | 5.01844700  | -1.38285500 | -5.05994700 | H  | 2.53157000  | 4.76012600  | 0.31796900  |
| C | 2.42042900  | -4.12269200 | -3.40461500 | H  | 5.66344700  | 4.48093700  | 0.12195000  |
| C | 3.01450100  | -2.90371200 | -3.70839200 | C  | 0.18773800  | 0.51579600  | -0.54890700 |
| H | -0.83279600 | -0.74751200 | -5.23322400 | H  | 4.68081900  | -5.50096300 | 0.20270100  |
| H | -1.28775200 | 0.95931000  | -5.12330900 | N  | 3.94468400  | -1.66685500 | -0.31285700 |
| H | 2.74096200  | -0.19232100 | -4.62010200 | C  | -2.84636400 | 4.37863600  | -1.00405500 |
| C | 5.37622500  | -0.99297300 | -4.09945500 | H  | -7.10693900 | 2.82759800  | -0.06978100 |
| H | 5.88934600  | -0.04466700 | -4.29994200 | H  | -0.83476400 | 5.22747700  | -1.11898900 |
| H | -1.89164600 | -2.80717700 | -5.09085100 | H  | -3.06873200 | 6.55424800  | -0.89242300 |
| H | 6.11561700  | -1.70304200 | -3.71273600 | C  | -5.16702500 | 1.88342500  | -0.23907800 |
| C | -1.32400200 | -0.00207300 | -4.59628000 | Mg | -2.57958300 | 0.42236000  | -0.47376300 |
| C | -2.77961900 | -0.38930200 | -4.29900000 | H  | -5.74190400 | 3.95989200  | -0.11255900 |
| H | 1.91633400  | -5.50708100 | -1.84653000 | H  | 1.39607800  | -4.89086400 | 1.89075300  |
| H | -5.71538300 | -1.37869800 | -3.47615200 | H  | 7.11503900  | -2.74156900 | -0.02943600 |
| C | 2.37356900  | -4.54894000 | -2.08292700 | H  | 4.44144400  | 2.36378300  | 0.41657100  |
| H | -3.21000100 | 0.39739800  | -3.66955000 | C  | -6.07692800 | 2.98499400  | 0.25732700  |
| C | 3.20002800  | 0.21339500  | -3.71032300 | H  | 3.31370300  | -3.56735800 | 1.03480300  |
| C | -2.36872000 | -2.86735500 | -4.11544100 | H  | 3.64095700  | -5.94927600 | 1.56633600  |
| H | -7.07125900 | -0.44374300 | -2.80114200 | C  | 5.21536300  | -1.71331700 | 0.09160500  |
| H | 3.69727900  | 1.15350900  | -3.98042000 | H  | -4.70749100 | -2.23053200 | 0.02732400  |
| C | 3.56143600  | -2.08888800 | -2.71225300 | C  | -5.44899800 | -4.20937300 | -0.30518200 |
| C | 4.21584800  | -0.77346700 | -3.11548400 | C  | -4.28852600 | -3.20328800 | -0.25317400 |
| H | -0.73885800 | 0.09816100  | -3.67784400 | H  | -5.08990600 | -5.22665600 | -0.50166000 |
| C | -2.88088100 | -1.70303700 | -3.53427600 | C  | 4.02571000  | 3.26502400  | 0.88063700  |
| C | -6.17823000 | -1.02194500 | -2.55242300 | N  | -3.88972300 | 1.86706100  | 0.14876900  |
| H | -2.05202400 | -4.99010600 | -3.94299800 | C  | 5.18449600  | 4.25464300  | 1.08232600  |
| H | 2.40136900  | 0.44600700  | -3.00033600 | Mg | 2.58311300  | -0.38127300 | 0.51429900  |
| C | -2.45927400 | -4.09723200 | -3.47508700 | H  | 4.83183900  | 5.20193400  | 1.50773900  |
| H | -6.49703400 | -1.91053800 | -1.99462300 | C  | -0.18392600 | -0.47461800 | 0.59128700  |
| C | 2.90208700  | -3.77263500 | -1.04688700 | H  | -5.97847200 | -4.22806600 | 0.65500400  |
| H | 4.63114600  | -0.31453100 | -2.21131600 | O  | -1.41192000 | -0.64676500 | 0.80289600  |
| H | -1.47162300 | 4.65043800  | -2.66660800 | C  | -2.83440300 | 4.07046800  | 0.48801300  |
| C | 3.49323300  | -2.52613500 | -1.36726900 | H  | 5.95142000  | 3.85584600  | 1.75545500  |
| H | -3.66818500 | 5.83689100  | -2.39354000 | H  | -6.06032100 | 3.04505600  | 1.34999500  |
| H | -6.80409000 | 1.10890000  | -1.31205100 | O  | 0.77655500  | -1.01431500 | 1.19833300  |
| H | 0.86905400  | -5.23679700 | 0.23625300  | C  | 5.76277000  | -0.90412500 | 1.10674700  |
| C | -5.21173400 | -0.20349900 | -1.72436200 | C  | -3.39471400 | 2.88659100  | 1.02672400  |
| C | -3.50160100 | -1.79595600 | -2.26476300 | C  | -3.28786400 | -3.60837600 | 0.84045800  |
| H | 3.46974000  | 4.11956100  | -1.03993900 | H  | -2.49063700 | -2.86818000 | 0.95409300  |
| H | 3.19702500  | -6.42027400 | -0.08101200 | H  | 6.81350300  | -1.08016900 | 1.30672200  |
| H | 6.39413600  | -2.34163000 | -1.59815400 | H  | -2.82397700 | -4.57571400 | 0.61160400  |
| C | -3.07892400 | -4.17748100 | -2.23382500 | C  | 3.39859800  | 2.85881200  | 2.20858900  |
| N | -3.94367900 | -0.60169200 | -1.60670200 | H  | 2.80294000  | 4.87430900  | 2.65906400  |
| C | -5.75453300 | 0.93776000  | -1.10128600 | H  | -1.82253500 | 5.90690700  | 0.96139300  |
| O | -0.77247300 | 1.02533000  | -1.18151000 | N  | 3.89784800  | 0.47920100  | 1.82409400  |
| H | 0.83790500  | -3.57299000 | 0.84855300  | C  | 5.17581400  | 0.10130100  | 1.89978500  |
| H | -3.38066000 | 3.56644000  | -1.50941400 | C  | -2.25998000 | 4.99642200  | 1.36447100  |
| C | -3.61166400 | -3.04592700 | -1.60861400 | C  | 2.81374100  | 3.84468600  | 3.00932600  |
| C | 1.40130400  | -4.51023500 | 0.86185800  | H  | -4.45286400 | 0.82360800  | 2.25153000  |
| H | 2.19236000  | 3.13610600  | -0.30812800 | H  | -3.79955400 | -3.70611400 | 1.80630200  |
| H | -3.15315100 | -5.14183100 | -1.73647200 | C  | 3.40388400  | 1.52149300  | 2.67489400  |
| H | 5.73885300  | -3.67449400 | -0.66207700 | C  | -3.39129800 | 2.66291800  | 2.42510100  |
| C | -1.42792400 | 4.43503200  | -1.59155700 | H  | 6.01386500  | 1.85646300  | 2.84908100  |
| C | -3.59364000 | 5.68664600  | -1.30977200 | H  | 7.12763600  | 0.47353700  | 2.75684000  |
| C | 2.99042800  | 3.85150600  | -0.09021000 | C  | 6.08637200  | 0.76659000  | 2.90785700  |
| C | 2.84488600  | -4.30874700 | 0.37815800  | C  | -4.01895000 | 1.42685700  | 3.05662200  |
| O | 1.41529300  | 0.71711000  | -0.73587000 | H  | -5.92334000 | 2.41135200  | 3.53496200  |
| H | -6.17379100 | -3.96021400 | -1.08807900 | C  | -2.23578300 | 4.77952100  | 2.73681200  |
| H | -0.89838000 | 3.48749400  | -1.45924900 | C  | 2.24841900  | 3.53745600  | 4.24098400  |
| H | -4.60873700 | 5.68779900  | -0.89754000 | H  | -2.19632100 | 0.21385800  | 3.09416700  |
| C | 3.63901100  | -5.61715200 | 0.52099200  | H  | 0.91339200  | -0.82270900 | 3.69282500  |

|   |             |             |            |
|---|-------------|-------------|------------|
| C | 2.84591600  | 1.19928900  | 3.93573600 |
| C | -2.80366900 | 3.62237300  | 3.25546700 |
| H | 1.79566200  | 4.31861200  | 4.84660500 |
| C | -5.15724700 | 1.79701200  | 4.02083600 |
| H | 5.79627400  | 0.48876300  | 3.92734600 |
| H | 3.39511700  | -0.85480200 | 3.79030100 |
| C | -2.97733400 | 0.55857000  | 3.77783800 |
| H | -5.64353700 | 0.89072000  | 4.40155200 |
| H | -1.78126400 | 5.51180800  | 3.39949000 |
| H | -3.45617100 | -0.32700500 | 4.21386200 |
| C | 2.27237700  | 2.22425500  | 4.69474500 |
| C | 2.85699700  | -0.21593400 | 4.49949900 |
| C | 1.43786800  | -0.78383500 | 4.65169400 |
| H | -2.79311100 | 3.45795300  | 4.33052000 |
| H | -4.78250500 | 2.35874600  | 4.88482600 |
| H | -2.49533300 | 1.11103900  | 4.59352000 |
| H | 1.47808800  | -1.80288200 | 5.05659200 |
| H | 1.83618600  | 1.98586200  | 5.66219100 |
| H | 0.84133000  | -0.17550700 | 5.34239700 |
| H | 4.61283500  | 0.12326000  | 5.77702700 |
| C | 3.59908900  | -0.28690500 | 5.84388400 |
| H | 3.67608000  | -1.32754100 | 6.18145100 |
| H | 3.06930700  | 0.27362100  | 6.62344400 |

**oxoTS<sub>III-VII</sub>**

*H* = -3786.153442 au

*G* = -3786.349244 au

*GD3BJ* = -0.4464758279 au

|   |             |             |             |
|---|-------------|-------------|-------------|
| H | -1.73155200 | -1.72358800 | -6.80929000 |
| H | -0.37188500 | 0.21400100  | -6.10377200 |
| C | -1.94767900 | -1.21794700 | -5.87129600 |
| H | 0.10061400  | 2.37056800  | -5.87050300 |
| H | -3.57046200 | -2.52202600 | -5.37310700 |
| C | -1.18816400 | -0.12719600 | -5.47170200 |
| C | -2.98418900 | -1.66328100 | -5.05859300 |
| H | -1.42557000 | 3.10629400  | -5.36384500 |
| C | -0.44624100 | 2.76703900  | -5.00676800 |
| H | 0.10866100  | 3.64080900  | -4.64541900 |
| H | 1.30495500  | 0.67443900  | -4.24802400 |
| C | -1.45054300 | 0.54679300  | -4.27358800 |
| H | -6.01229900 | -1.03293700 | -4.37937200 |
| H | 3.88319400  | 4.70174100  | -3.67741100 |
| H | -4.31802700 | 1.65584800  | -4.24065100 |
| H | -5.00058000 | -3.39822400 | -4.02459200 |
| C | -3.27890400 | -1.03638300 | -3.84462700 |
| C | -0.57108700 | 1.72492600  | -3.88593300 |
| H | -3.24400700 | 3.00285000  | -3.89479800 |
| H | 5.35801000  | 0.36773100  | -3.77190900 |
| H | 5.18478800  | 2.60518000  | -3.51921500 |
| C | 0.81628200  | 1.23923000  | -3.44424900 |
| C | -2.50674400 | 0.08824000  | -3.45581000 |
| C | -4.06384500 | 2.40181700  | -3.48327000 |
| H | 1.46034400  | 2.08665100  | -3.18548900 |
| C | -5.75718800 | -0.87567200 | -3.32392600 |
| C | 3.73806900  | 4.03083700  | -2.83426800 |
| H | -4.92247900 | 3.06004900  | -3.33171800 |
| C | -4.59400100 | -3.07978300 | -3.05711600 |
| H | -1.03296300 | 2.22115300  | -3.02481300 |
| C | -4.42174300 | -1.55725200 | -2.98214500 |
| H | -3.64767100 | -3.60872000 | -2.90209800 |
| C | 4.46622300  | 2.85169700  | -2.74108900 |

|    |             |             |             |
|----|-------------|-------------|-------------|
| H  | 0.73467100  | 0.59060300  | -2.56557500 |
| H  | -5.72693900 | 0.20125200  | -3.13753400 |
| H  | 3.90769100  | -0.36841100 | -3.07789300 |
| C  | 4.96239700  | -0.14406100 | -2.88636200 |
| H  | 5.50248400  | -1.09355700 | -2.78919000 |
| H  | -6.56810100 | -1.29506300 | -2.71534000 |
| H  | 2.24058600  | 5.25885400  | -1.91504800 |
| H  | -5.30221000 | -3.41335500 | -2.28998200 |
| H  | 7.03873700  | 1.61262900  | -2.19062200 |
| C  | 2.81840900  | 4.34086000  | -1.83932000 |
| N  | -2.79140200 | 0.71813500  | -2.19905200 |
| H  | -4.18309800 | -1.29874700 | -1.94291500 |
| C  | -3.62846600 | 1.75861400  | -2.18153100 |
| C  | 4.29923200  | 1.97354500  | -1.66525200 |
| C  | 5.13431000  | 0.70300700  | -1.61749200 |
| C  | 6.62037900  | 1.00973200  | -1.37522000 |
| S  | -1.19233800 | -2.81670200 | -1.31866600 |
| H  | 7.20050600  | 0.08081400  | -1.31469200 |
| H  | -0.01097400 | 4.26448100  | -1.15175300 |
| S  | 1.84704500  | -2.19609100 | -1.59756200 |
| C  | 2.62016400  | 3.50077600  | -0.73913700 |
| H  | -4.80565300 | 3.19253800  | -1.18513500 |
| C  | -4.15929800 | 2.33982400  | -1.01110000 |
| H  | 4.78006300  | 0.10932800  | -0.76815800 |
| C  | 0.29178900  | -2.30847900 | -1.34258900 |
| H  | 6.77216100  | 1.56119700  | -0.44116100 |
| C  | 3.37365400  | 2.30600900  | -0.64665600 |
| H  | 1.49722700  | 6.05897500  | 0.00933200  |
| H  | 4.22033300  | -4.00737100 | -1.17846500 |
| Mg | -1.76857800 | 0.25924000  | -0.44241700 |
| H  | 5.83432400  | -3.26702300 | -1.18163700 |
| H  | 0.02927500  | 2.60128100  | -0.52394600 |
| C  | 0.16368400  | 3.65527500  | -0.25639200 |
| H  | -5.18138600 | -3.27111100 | 0.27403500  |
| H  | -7.15802400 | -1.71089900 | 0.59293400  |
| H  | 5.55360600  | -4.75695700 | -0.28598700 |
| C  | 5.10107000  | -3.79698700 | -0.56240300 |
| O  | 0.00092400  | -0.12659100 | -0.07936100 |
| C  | 1.57660800  | 3.88633600  | 0.29835300  |
| H  | -4.87637900 | -0.81354100 | 0.31573000  |
| C  | 1.72616700  | 5.33097000  | 0.79636800  |
| H  | -0.59561800 | 3.92576100  | 0.48740700  |
| H  | -6.98497500 | -0.20448700 | 1.50980400  |
| H  | 2.74091900  | 5.54017600  | 1.15336800  |
| C  | -4.11125400 | 1.90280600  | 0.32737800  |
| N  | 3.19065100  | 1.40722800  | 0.45570300  |
| C  | -6.64210200 | -1.24264100 | 1.43994200  |
| Mg | 1.77397400  | -0.13107900 | 0.46118700  |
| C  | -4.67261000 | -2.78786100 | 1.11671100  |
| H  | 5.41165000  | 2.98877800  | 0.86566400  |
| C  | -5.12000100 | -1.32495600 | 1.25274600  |
| N  | -3.31408400 | 0.93110900  | 0.78319700  |
| H  | 1.70112700  | 3.22243700  | 1.16008100  |
| H  | 1.03101200  | 5.51882100  | 1.62341100  |
| H  | -3.59217300 | -2.86186100 | 0.95222600  |
| H  | -5.63747100 | 3.37225200  | 0.76905500  |
| H  | -4.90734700 | -3.36375400 | 2.02001800  |
| H  | 4.07738500  | 3.79782500  | 1.66618700  |
| H  | -6.96400700 | -1.76097600 | 2.35119500  |
| C  | 4.75009300  | -2.95329200 | 0.67001400  |
| H  | 4.47018000  | -1.95129600 | 0.32277400  |
| C  | 4.70834800  | 2.90353300  | 1.70019300  |

C -5.06575500 2.59350100 1.27837900  
 C 3.87535200 1.64345400 1.57954100  
 H 4.11190700 -5.55143700 1.11415400  
 H 6.84391000 -2.42485400 0.96146400  
 H -0.67765400 -1.93756100 1.69560900  
 H -5.76905900 1.87368900 1.71082800  
 C 3.56475100 -3.49973500 1.45546900  
 C 3.39829000 -4.88137400 1.58562300  
 H 6.28763200 -3.75564400 1.99451800  
 C 5.99764300 -2.79312300 1.55482900  
 C -3.50665200 0.47659300 2.13001100  
 C -4.36669100 -0.62138000 2.37183900  
 H -4.52922000 3.04517800 2.11884900  
 H -1.98246600 2.60138500 1.96691200  
 H 5.27344100 2.91513000 2.63464600  
 N 2.78269700 -1.22244800 1.92724600  
 H -0.17215000 1.00923100 2.43954800  
 C 2.62903000 -2.63909500 2.08503300  
 H 2.21947700 -6.49677200 2.38555900  
 C 2.33380600 -5.41881100 2.30063500  
 C -0.81959700 -2.33299000 2.70713900  
 C 3.90423200 0.78921800 2.70011200  
 H -1.20036000 -3.35925000 2.63125600  
 H -1.58010700 -1.72471400 3.20887000  
 H 0.28185700 2.62845300 3.01800600  
 C 1.54508300 -3.17611100 2.81430700  
 C 1.41708300 -4.56691200 2.90115400  
 H 5.83200500 -2.08376900 2.37041700  
 C -0.41140700 1.79213100 3.16775600  
 C 3.47854300 -0.54740000 2.84461200  
 C -1.86570100 2.25463600 2.99929000  
 H 0.86637100 -1.26565300 3.46569100  
 C -2.82166700 1.09011100 3.20526100  
 H 0.58114200 -4.98783100 3.45461100  
 C 0.50161900 -2.29867100 3.48737500  
 H 4.44685000 1.18276000 3.55213700  
 C -4.52817000 -1.07815300 3.68372200  
 H -5.19057400 -1.91955500 3.87458700  
 H -0.23999600 1.39118200 4.17424400  
 H -1.51719600 4.29192000 3.66801400  
 C -2.16289200 3.44343400 3.92446400  
 H -3.20422000 3.77562700 3.84459600  
 C 3.85642100 -1.21641800 4.15128800  
 H 4.23016900 -2.23168700 3.99550800  
 C -3.01372400 0.59291500 4.49837900  
 H 2.97193000 -1.30140100 4.79423400  
 C -3.86188700 -0.48005400 4.74593400  
 C 0.26920200 -2.67460200 4.95788900  
 H -1.97443300 3.19854300 4.97637500  
 H -0.19724500 -3.66203900 5.05581000  
 H 4.61188000 -0.63898600 4.68929900  
 H -0.40649800 -1.94968800 5.42661700  
 H -2.48906500 1.05960200 5.32867100  
 H 1.20418200 -2.69298300 5.52995500  
 H -4.00130600 -0.84773300 5.75954100

## VII

$H = -3786.240379 \text{ au}$

$G = -3786.435512 \text{ au}$

$GD3BJ = -0.4426799191 \text{ au}$

H -2.44004400 -1.13754200 -7.20125300

H -0.69879300 0.40301700 -6.36342300  
 C -2.51497000 -0.72163600 -6.19954900  
 H 0.01198600 2.52778500 -5.90836400  
 H -4.33886100 -1.75056500 -5.74293800  
 C -1.54177700 0.14744000 -5.72568200  
 C -3.58086800 -1.06271100 -5.37587800  
 H -1.24292500 3.41094500 -5.03240800  
 C -0.31742900 2.83706200 -4.90922100  
 H 0.44992100 3.50692600 -4.50396800  
 H 1.16043100 0.49043300 -4.80970500  
 C -1.61925200 0.70338400 -4.44440700  
 H -6.41633000 -0.69321300 -4.75805800  
 H 3.68331100 4.34612600 -3.95108500  
 H -4.42426200 2.21554500 -4.09308400  
 H -5.24998700 -2.94761500 -4.10191800  
 C -3.69816700 -0.54551700 -4.08280800  
 C -0.50694100 1.62823000 -3.98105400  
 H -3.08010200 3.29606900 -3.77237000  
 H 5.23854500 0.05880800 -3.76121100  
 H 5.05686200 2.31254300 -3.65596500  
 C 0.81503200 0.86093700 -3.83663600  
 C -2.71437700 0.36297400 -3.62044400  
 C -3.96329700 2.83329000 -3.31743000  
 H 1.59700700 1.51020000 -3.42816800  
 C -6.20069700 -0.36409200 -3.73414000  
 C 3.56369900 3.73064500 -3.06300900  
 H -4.66004900 3.62602600 -3.03643300  
 C -5.00602000 -2.49907700 -3.13162700  
 H -0.78292000 2.01099200 -2.99257500  
 C -4.88332600 -0.97157500 -3.22670700  
 H -4.07593900 -2.95575000 -2.77883300  
 C 4.33316600 2.58724600 -2.89242300  
 H 0.70651400 -0.00816300 -3.18021200  
 H -6.17031100 0.73044700 -3.73482700  
 H 3.86413700 -0.70381100 -2.94366800  
 C 4.91035300 -0.40411000 -2.82302900  
 H 5.50759100 -1.31140700 -2.67696600  
 H -7.03887300 -0.67559400 -3.09853200  
 H 2.02562700 4.96683800 -2.22536900  
 H -5.80938800 -2.77188400 -2.43658600  
 H 6.94185800 1.47089200 -2.32922200  
 C 2.63484900 4.07687600 -2.08827500  
 N -2.83706600 0.89492800 -2.29026100  
 H -4.71443700 -0.58944000 -2.21384500  
 C -3.55428400 2.00590300 -2.11677500  
 C 4.20161700 1.78020500 -1.75706700  
 C 5.08561800 0.54778200 -1.63128300  
 C 6.56299100 0.93066300 -1.45308700  
 S -1.39445600 -2.36169800 -1.34074800  
 H 7.17919600 0.03283500 -1.32277500  
 H -0.20663500 3.95239400 -1.35643100  
 S 1.63240300 -2.29423100 -1.16060400  
 C 2.46965300 3.30941200 -0.93134700  
 H -4.57256900 3.40180100 -0.91761100  
 C -3.99868100 2.48384800 -0.86588600  
 H 4.78091500 0.00783500 -0.72752300  
 C 0.08096200 -1.63209600 -0.87032600  
 H 6.71180700 1.57116100 -0.57668900  
 C 3.26872600 2.15230500 -0.75944900  
 H 1.23587800 5.86707500 -0.37519000  
 H 4.44074800 -3.15156600 -0.66450500  
 Mg -2.03275500 -0.09567800 -0.66065400

|    |             |             |             |
|----|-------------|-------------|-------------|
| H  | 6.19309900  | -2.86709800 | -0.58060900 |
| H  | -0.08642500 | 2.33467900  | -0.65212500 |
| C  | 0.00989600  | 3.40312700  | -0.43263600 |
| H  | -5.24278900 | -3.42672000 | 0.11441600  |
| H  | -7.06534700 | -1.68694100 | 0.36630600  |
| H  | 5.51389800  | -4.41541900 | -0.05488500 |
| C  | 5.34128200  | -3.33267100 | -0.06955700 |
| O  | 0.01751700  | -0.46591700 | -0.23482100 |
| C  | 1.41708700  | 3.73031900  | 0.08464600  |
| H  | -4.68550600 | -1.03470500 | 0.16743700  |
| C  | 1.50232100  | 5.21559300  | 0.46528500  |
| H  | -0.75421900 | 3.67485900  | 0.30469900  |
| H  | -6.75797200 | -0.16895800 | 1.22784300  |
| H  | 2.50724300  | 5.50055400  | 0.79585400  |
| C  | -3.96556500 | 1.89225400  | 0.41096300  |
| N  | 3.12505400  | 1.33248700  | 0.41035800  |
| C  | -6.53271600 | -1.24099300 | 1.21495400  |
| Mg | 2.05243600  | -0.43489000 | 0.38287400  |
| C  | -4.73866200 | -3.00697100 | 0.99255400  |
| H  | 5.26506300  | 3.03723100  | 0.72579300  |
| C  | -5.02286400 | -1.50205300 | 1.09951500  |
| N  | -3.25050900 | 0.80822700  | 0.74101000  |
| H  | 1.57552500  | 3.14292900  | 0.99469700  |
| H  | 0.80310900  | 5.43661200  | 1.28049500  |
| H  | -3.66648500 | -3.20571500 | 0.89338900  |
| H  | -5.44135200 | 3.35361900  | 1.01220700  |
| H  | -5.10345800 | -3.55139000 | 1.87167400  |
| H  | 3.87154900  | 3.88087900  | 1.37503500  |
| H  | -6.94122700 | -1.67918500 | 2.13376100  |
| C  | 5.19631100  | -2.77390400 | 1.35398300  |
| H  | 5.04900300  | -1.69179900 | 1.27181700  |
| C  | 4.52873600  | 3.02122100  | 1.53637600  |
| C  | -4.84596400 | 2.55125600  | 1.45256800  |
| C  | 3.75733100  | 1.71749900  | 1.52772600  |
| H  | 4.81452600  | -5.34300000 | 2.01761900  |
| H  | 7.33584200  | -2.50716800 | 1.64983100  |
| H  | -0.61602200 | -2.91630100 | 1.64626000  |
| H  | -5.52527100 | 1.81987700  | 1.90267300  |
| C  | 3.97813700  | -3.36405100 | 2.05247300  |
| C  | 3.95864900  | -4.73806200 | 2.30805000  |
| H  | 6.73570900  | -4.07308300 | 2.21204400  |
| C  | 6.49333100  | -3.00582800 | 2.14439200  |
| C  | -3.41405400 | 0.26534400  | 2.05981400  |
| C  | -4.25737500 | -0.85666200 | 2.24548400  |
| H  | -4.25439300 | 2.97060300  | 2.27193200  |
| H  | -1.90534200 | 2.42055100  | 2.01383700  |
| H  | 5.05289400  | 3.16049300  | 2.48402900  |
| N  | 2.85423700  | -1.17538400 | 2.14535700  |
| H  | -0.09155200 | 0.76738000  | 2.34015100  |
| C  | 2.85766900  | -2.58461800 | 2.43161800  |
| H  | 2.87543100  | -6.41821000 | 3.10965100  |
| C  | 2.87040100  | -5.34782700 | 2.91935200  |
| C  | -0.74793000 | -2.92289300 | 2.73283000  |
| C  | 3.79983900  | 0.98622500  | 2.72891400  |
| H  | -0.98804500 | -3.95233100 | 3.02598000  |
| H  | -1.61249000 | -2.29773300 | 2.98131400  |
| H  | 0.38916600  | 2.35724600  | 2.96967500  |
| C  | 1.74153100  | -3.19738800 | 3.04398800  |
| C  | 1.77392900  | -4.57591400 | 3.27861700  |
| H  | 6.42630200  | -2.61817600 | 3.16660800  |
| C  | -0.30635400 | 1.52092300  | 3.10490400  |
| C  | 3.47235200  | -0.35965100 | 2.99932100  |

|   |             |             |            |
|---|-------------|-------------|------------|
| C | -1.76265900 | 1.99647600  | 3.01296800 |
| H | 0.65960000  | -1.37078400 | 3.17451500 |
| C | -2.72040400 | 0.82270600  | 3.16204700 |
| H | 0.91844700  | -5.05181600 | 3.75209200 |
| C | 0.50555500  | -2.41688700 | 3.45988800 |
| H | 4.29659700  | 1.49650500  | 3.54644300 |
| C | -4.41293800 | -1.37761900 | 3.53458500 |
| H | -5.07065800 | -2.23008900 | 3.68557900 |
| H | -0.10059000 | 1.06967600  | 4.08256900 |
| H | -1.37946000 | 3.98108900  | 3.80775900 |
| C | -2.01134100 | 3.11449200  | 4.03607900 |
| H | -3.05472200 | 3.44854900  | 4.03944600 |
| C | 3.93986400  | -0.88197200 | 4.34122900 |
| H | 4.86101700  | -1.46411700 | 4.22724800 |
| C | -2.90377800 | 0.25812500  | 4.42801800 |
| H | 3.20108800  | -1.54933800 | 4.79142000 |
| C | -3.74899500 | -0.82815800 | 4.62362100 |
| C | 0.28419700  | -2.45008900 | 4.97982800 |
| H | -1.76539200 | 2.79478600  | 5.05537400 |
| H | 0.11525400  | -3.47399400 | 5.33469300 |
| H | 4.14585700  | -0.05811900 | 5.02906200 |
| H | -0.59834700 | -1.85663300 | 5.24566200 |
| H | -2.37677500 | 0.68169100  | 5.27953300 |
| H | 1.14272100  | -2.04755600 | 5.52911100 |
| H | -3.88546200 | -1.24545200 | 5.61813600 |

### VIII

$H = -3416.314657 \text{ au}$

$G = -3416.529837 \text{ au}$

$GD3BJ = -0.4977539652 \text{ au}$

|    |             |             |             |
|----|-------------|-------------|-------------|
| Mg | 1.54834000  | 4.38866500  | 4.01495600  |
| O  | 1.55093100  | 4.10310700  | 5.84972700  |
| N  | 0.30529100  | 3.52348400  | 2.49510300  |
| C  | 0.05274600  | 2.96189000  | 0.10350500  |
| H  | 0.31858200  | 1.91179600  | 0.26552800  |
| H  | 0.44995500  | 3.28112100  | -0.86310600 |
| H  | -1.04031400 | 2.99782600  | 0.05297800  |
| O  | 3.44800900  | 3.53572400  | 3.38714600  |
| N  | 1.68187600  | 6.21136600  | 2.87524300  |
| C  | 0.57651400  | 3.83666300  | 1.22720000  |
| C  | 1.31735700  | 4.96356500  | 0.81728600  |
| H  | 1.48594900  | 5.02863700  | -0.25201400 |
| C  | 1.72560200  | 6.10043300  | 1.54615500  |
| C  | 2.25142300  | 7.24860900  | 0.70239100  |
| H  | 1.74683100  | 8.18948400  | 0.93993600  |
| H  | 2.12646300  | 7.04512100  | -0.36376900 |
| H  | 3.31680600  | 7.41312300  | 0.89913600  |
| C  | -0.67194800 | 2.50077300  | 2.71600400  |
| C  | -0.27664400 | 1.16071100  | 2.93389800  |
| C  | -1.25722100 | 0.18915000  | 3.15666800  |
| H  | -0.95273500 | -0.84057200 | 3.32826700  |
| C  | -2.60873400 | 0.51040700  | 3.16140200  |
| H  | -3.35774400 | -0.26008900 | 3.32855500  |
| C  | -2.99134000 | 1.82951200  | 2.95104100  |
| H  | -4.04901400 | 2.08460300  | 2.95505500  |
| C  | -2.04852400 | 2.83697400  | 2.72539700  |
| C  | 1.18483500  | 0.74789000  | 2.94568800  |
| H  | 1.76845400  | 1.60327600  | 2.59102100  |
| C  | 1.64080200  | 0.43708300  | 4.37679400  |
| H  | 1.52687100  | 1.31127000  | 5.02765200  |
| H  | 2.69404800  | 0.12950900  | 4.38785900  |

|    |             |             |             |   |             |             |             |
|----|-------------|-------------|-------------|---|-------------|-------------|-------------|
| H  | 1.05668100  | -0.38031700 | 4.81316500  | O | -0.34611800 | 4.67025100  | 8.31236400  |
| C  | 1.47615600  | -0.43437100 | 2.01051800  | N | 1.42009300  | 1.99477000  | 8.82424900  |
| H  | 0.98499400  | -1.35359800 | 2.35069100  | C | 2.52558500  | 4.36949000  | 10.47217300 |
| H  | 2.55413500  | -0.63720900 | 1.97895800  | C | 1.78473200  | 3.24261400  | 10.88215600 |
| H  | 1.13843600  | -0.23829800 | 0.98616000  | H | 1.61618000  | 3.17758500  | 11.95146500 |
| C  | -2.54323100 | 4.25865600  | 2.49828800  | C | 1.37641600  | 2.10574600  | 10.15334000 |
| H  | -1.67223600 | 4.88677600  | 2.28724300  | C | 0.85059300  | 0.95760000  | 10.99714100 |
| C  | -3.21967300 | 4.81357000  | 3.75918400  | H | 1.35522800  | 0.01672900  | 10.75967000 |
| H  | -4.09156300 | 4.21118200  | 4.04271600  | H | 0.97548900  | 1.16114800  | 12.06329700 |
| H  | -3.56538900 | 5.84092100  | 3.59248200  | H | -0.21477500 | 0.79304200  | 10.80034300 |
| H  | -2.52596800 | 4.81807400  | 4.60562700  | C | 3.77396800  | 5.70535500  | 8.98330200  |
| C  | -3.49656300 | 4.36273700  | 1.29816200  | C | 3.37861800  | 7.04542400  | 8.76555200  |
| H  | -3.03466500 | 3.99152200  | 0.37706300  | C | 4.35916000  | 8.01702100  | 8.54277900  |
| H  | -3.78512500 | 5.40755600  | 1.12982800  | H | 4.05464500  | 9.04674600  | 8.37125700  |
| H  | -4.41654800 | 3.78846300  | 1.46163600  | C | 5.71067900  | 7.69579100  | 8.53792400  |
| C  | 1.91906700  | 7.51489700  | 3.41888400  | H | 6.45966000  | 8.46631300  | 8.37075800  |
| C  | 3.22744400  | 7.94959900  | 3.73313800  | C | 6.09333300  | 6.37668300  | 8.74817700  |
| C  | 3.41208000  | 9.25110900  | 4.21145000  | H | 7.15101400  | 6.12162300  | 8.74407900  |
| H  | 4.41712000  | 9.58914800  | 4.45279300  | C | 5.15055400  | 5.36918400  | 8.97380900  |
| C  | 2.34297300  | 10.12258800 | 4.37495900  | C | 1.91712800  | 7.45821200  | 8.75394000  |
| H  | 2.50897000  | 11.13708500 | 4.72972200  | H | 1.33353800  | 6.60269400  | 9.10834500  |
| C  | 1.05599300  | 9.67806100  | 4.09457900  | C | 1.46109100  | 7.76950400  | 7.32296500  |
| H  | 0.21791600  | 10.35559800 | 4.23760200  | H | 1.57507000  | 6.89556800  | 6.67177900  |
| C  | 0.81681100  | 8.37989900  | 3.63369700  | H | 0.40782200  | 8.07700600  | 7.31206500  |
| C  | 4.43911900  | 7.04211400  | 3.58991800  | H | 2.04512700  | 8.58711000  | 6.88686900  |
| H  | 4.11589600  | 6.14375900  | 3.05426100  | C | 1.62581100  | 8.64013500  | 9.68954300  |
| C  | 4.94246600  | 6.60263600  | 4.97155000  | H | 2.11698100  | 9.55948300  | 9.34971200  |
| H  | 5.23327000  | 7.46617400  | 5.57922100  | H | 0.54783300  | 8.84296600  | 9.72117900  |
| H  | 5.82368100  | 5.95517000  | 4.87534500  | H | 1.96352900  | 8.44368000  | 10.71382900 |
| H  | 4.16998100  | 6.05821800  | 5.52478000  | C | 5.64529900  | 3.94748600  | 9.20073300  |
| C  | 5.58025900  | 7.68529600  | 2.78811000  | H | 4.77434700  | 3.31935900  | 9.41195400  |
| H  | 5.24523200  | 8.04790500  | 1.80968100  | C | 6.32141900  | 3.39265800  | 7.93963200  |
| H  | 6.38457800  | 6.95763500  | 2.62269700  | H | 7.19309500  | 3.99521400  | 7.65580000  |
| H  | 6.02049900  | 8.53634900  | 3.32105300  | H | 6.66738400  | 2.36537600  | 8.10624500  |
| C  | -0.61300800 | 7.93768000  | 3.35371700  | H | 5.62742800  | 3.38799700  | 7.09342400  |
| H  | -0.60874400 | 6.84247400  | 3.31792300  | C | 6.59892200  | 3.84331000  | 10.40062000 |
| C  | -1.58471200 | 8.36565900  | 4.46120200  | H | 6.13727900  | 4.21454300  | 11.32183900 |
| H  | -1.22662200 | 8.05496400  | 5.44801300  | H | 6.88743300  | 2.79846200  | 10.56885500 |
| H  | -2.56934500 | 7.91383300  | 4.29573800  | H | 7.51892200  | 4.41749900  | 10.23694500 |
| H  | -1.73019300 | 9.45225700  | 4.48476900  | H | 1.18285200  | 0.69121000  | 8.28069100  |
| C  | -1.11592500 | 8.44224400  | 1.99210800  | C | -0.12553100 | 0.25654400  | 7.96641600  |
| H  | -1.08297500 | 9.53810900  | 1.94428500  | C | -0.31022400 | -1.04501000 | 7.48824500  |
| H  | -2.15436300 | 8.12983300  | 1.82479700  | H | -1.31527900 | -1.38301700 | 7.24691500  |
| H  | -0.51472400 | 8.04878000  | 1.16704000  | C | 0.75883300  | -1.91658300 | 7.32490900  |
| C  | 4.04111500  | 3.37335100  | 2.07985700  | H | 0.59278900  | -2.93111800 | 6.97027700  |
| H  | 4.08246400  | 4.34990200  | 1.59129300  | C | 2.04582000  | -1.47211100 | 7.60534200  |
| H  | 3.38508900  | 2.72451100  | 1.49007000  | H | 2.88386100  | -2.14973700 | 7.46251100  |
| C  | 5.41274100  | 2.74401400  | 2.31666400  | C | 2.28506000  | -0.17391100 | 8.06608000  |
| H  | 6.18010400  | 3.51960000  | 2.42587900  | C | -1.33718500 | 1.16407000  | 8.10955800  |
| H  | 5.71137600  | 2.08791400  | 1.49324000  | H | -1.01391800 | 2.06251400  | 8.64503600  |
| C  | 5.21260800  | 2.00674100  | 3.64324200  | C | -1.84064200 | 1.60330000  | 6.72788800  |
| H  | 4.69763700  | 1.05317300  | 3.47973900  | H | -2.13138600 | 0.73964300  | 6.12035700  |
| H  | 6.14922900  | 1.80552100  | 4.17180500  | H | -2.72191700 | 2.25069100  | 6.82403700  |
| C  | 4.31855000  | 2.97656600  | 4.39795700  | H | -1.06824600 | 2.14772100  | 6.17454000  |
| H  | 3.67718100  | 2.54413700  | 5.16585500  | C | -2.47827000 | 0.52102800  | 8.91156000  |
| H  | 4.90225800  | 3.78940100  | 4.84307400  | H | -2.14317900 | 0.15859300  | 9.89002900  |
| Mg | 1.55358800  | 3.81740600  | 7.68447300  | H | -3.28258200 | 1.24871700  | 9.07689600  |
| N  | 2.79676200  | 4.68262800  | 9.20425600  | H | -2.91854000 | -0.33011900 | 8.37879300  |
| C  | 3.04939200  | 5.24430800  | 11.59581500 | C | 3.71490100  | 0.26814500  | 8.34621000  |
| H  | 2.78352300  | 6.29439000  | 11.43376500 | H | 3.71074600  | 1.36334000  | 8.38224800  |
| H  | 2.65224000  | 4.92510400  | 12.56245700 | C | 4.68656800  | -0.15968500 | 7.23863300  |
| H  | 4.14245600  | 5.20840500  | 11.64628900 | H | 4.32863000  | 0.15151100  | 6.25192300  |



|   |             |             |             |
|---|-------------|-------------|-------------|
| H | 5.67132500  | 0.29178100  | 7.40433500  |
| H | 4.83170900  | -1.24631800 | 7.21463700  |
| C | 4.21771100  | -0.23679200 | 9.70771700  |
| H | 4.18477500  | -1.33267100 | 9.75524500  |
| H | 5.25612700  | 0.07559000  | 9.87521500  |
| H | 3.61641400  | 0.15643000  | 10.53283600 |
| C | -0.93914200 | 4.83267800  | 9.61968400  |
| H | -0.98048000 | 3.85614300  | 10.10828100 |
| H | -0.28306800 | 5.48152700  | 10.20940100 |
| C | -2.31078300 | 5.46200800  | 9.38293600  |
| H | -3.07815500 | 4.68641400  | 9.27383000  |
| H | -2.60935900 | 6.11816200  | 10.20633800 |
| C | -2.11075300 | 6.19919400  | 8.05629100  |
| H | -1.59579400 | 7.15278100  | 8.21969900  |
| H | -3.04741400 | 6.40035600  | 7.52778100  |
| C | -1.21673900 | 5.22933100  | 7.30158100  |
| H | -0.57543400 | 5.66168400  | 6.53358400  |
| H | -1.80047900 | 4.41645100  | 6.85657800  |

|   |             |            |             |
|---|-------------|------------|-------------|
| H | 11.98365400 | 0.79994200 | 0.16957400  |
| H | 10.84679300 | 1.85708500 | -0.69519600 |

### CO<sub>2</sub>

*H= -188.488908 au*

*G= -188.513197 au*

*GD3BJ= -0.0016110417 au*

|   |             |             |            |
|---|-------------|-------------|------------|
| C | -0.15896000 | -0.02890200 | 0.00000000 |
| O | 1.00890400  | -0.02890200 | 0.00000000 |
| O | -1.32682300 | -0.02890200 | 0.00000000 |

### CS<sub>2</sub>

*H= -834.352773 au*

*G= -834.379731 au*

*GD3BJ= -0.0051880734 au*

|   |            |            |             |
|---|------------|------------|-------------|
| C | 0.00000000 | 0.00000000 | 0.00000000  |
| S | 0.00000000 | 0.00000000 | 1.55943200  |
| S | 0.00000000 | 0.00000000 | -1.55943200 |

### CO

*H= -113.249934 au*

*G= -113.272375 au*

*GD3BJ= -0.0007103159 au*

|   |             |             |            |
|---|-------------|-------------|------------|
| C | -0.09826800 | -0.02890200 | 0.00000000 |
| O | 1.03874900  | -0.02890200 | 0.00000000 |

### THF

*H= -232.239314 au*

*G= -232.273611 au*

*GD3BJ= -0.0155303282 au*

|   |             |             |             |
|---|-------------|-------------|-------------|
| C | 10.91831400 | 0.97423900  | -0.04808000 |
| O | 10.39020200 | -0.15147700 | -0.74395100 |
| C | 9.48851600  | -0.86251700 | 0.09721000  |
| C | 9.72683000  | -0.34719300 | 1.51578800  |
| C | 10.10844300 | 1.10945200  | 1.24243600  |
| H | 8.45171800  | -0.66859100 | -0.22197300 |
| H | 9.68049400  | -1.93639600 | -0.01307800 |
| H | 8.85126100  | -0.45786100 | 2.16335100  |
| H | 10.56541100 | -0.87986000 | 1.98093300  |
| H | 10.67665500 | 1.57452100  | 2.05422600  |
| H | 9.20788600  | 1.71159600  | 1.06992100  |
